1 **May 17, 2021**

2

3 **Reduced calcium storage blunts calcium signaling in *Toxoplasma***

4 **bradyzoites and impedes motility and egress**

5

6 Yong Fu<sup>1</sup>, Kevin M. Brown<sup>1a</sup>, Nathaniel G. Jones<sup>1b</sup>, Silvia N. J. Moreno<sup>2</sup>, L. David Sibley<sup>1\*</sup>

7 <sup>1</sup>Department of Molecular Microbiology, Washington University in St. Louis, School of Medicine, St Louis,  
8 MO, United States

9 <sup>2</sup>Center for Tropical and Emerging Global Diseases and Department of Cellular Biology, University of  
10 Georgia, Athens, GA, United States

11

12 Running title: *Calcium signaling in bradyzoites*

13 \* Corresponding author

14 E-mail: [sibley@wustl.edu](mailto:sibley@wustl.edu)

15

16 Present addresses

17 <sup>a</sup>Department of Microbiology and Immunology, University of Oklahoma Health Sciences Center, College of  
18 Medicine, Oklahoma City, OK, United States

19 <sup>b</sup>York Biomedical Research Institute, Department of Biology, University of York, Wentworth Way, Heslington,  
20 York, YO10 5DD, U.K.

21

22 **Key words:** tissue cyst, chronic infection, microneme secretion, calcium signaling, calcium ATPases,  
23 exocytosis, motility

24

25

26

## 27 **Abstract**

28 *Toxoplasma gondii* has evolved different developmental stages of tachyzoites for disseminating during acute  
29 infection and bradyzoites for establishing chronic infection. Calcium ion ( $\text{Ca}^{2+}$ ) signaling tightly regulates the  
30 lytic cycle of tachyzoites by controlling microneme secretion and motility to drive egress. However, the roles  
31 of  $\text{Ca}^{2+}$  signaling pathways in bradyzoites remain largely unknown. Here we show that  $\text{Ca}^{2+}$  signals and egress  
32 by bradyzoites in response to agonists are highly restricted. Development of dual-reporter parasites revealed  
33 dampened calcium responses and minimal microneme secretion by bradyzoites induced in vitro or harvested  
34 from infected mice and tested ex vivo. Ratiometric  $\text{Ca}^{2+}$  imaging demonstrated lower  $\text{Ca}^{2+}$  basal levels,  
35 reduced magnitude, and slower  $\text{Ca}^{2+}$  kinetics in bradyzoites compared with tachyzoites stimulated with  
36 agonists. Diminished responses in bradyzoites were associated with down-regulation of calcium ATPases  
37 involved in intracellular  $\text{Ca}^{2+}$  storage in the endoplasmic reticulum (ER) and acidocalcisome. Once liberated  
38 from cysts by trypsin digestion, bradyzoites displayed weaker gliding motility associated with  $\text{Ca}^{2+}$   
39 oscillations compared with tachyzoites, although gliding motility of bradyzoites was enhanced by uptake of  
40 exogenous  $\text{Ca}^{2+}$ . Collectively, our findings indicate that bradyzoites exhibit dampened  $\text{Ca}^{2+}$  signaling due to a  
41 decreased amount of stored  $\text{Ca}^{2+}$ , limiting microneme secretion and egress, likely constituting an adaptation to  
42 their long-term intracellular niche.

43

44

## 45 **Introduction**

46 *Toxoplasma gondii* is an obligate intracellular parasite, capable of infecting nearly all warm-blooded  
47 animals and frequently causing human infections [1]. The ingestion of tissue cysts in undercooked meat or  
48 shed oocysts by infected cats are the major transmission routes of *T. gondii* [2,3]. Following oral ingestion of  
49 bradyzoites within tissue cysts or sporozoites within oocysts, the parasite migrates across the intestinal  
50 epithelial barrier and disseminates throughout the body as the actively proliferating tachyzoite form that  
51 infects many cell types but primarily traffics in monocytes [4]. In response to immune pressure, the parasite  
52 differentiates to asynchronously growing bradyzoites within cysts that can persist as chronic infections in  
53 muscle and brain tissues [5-7].

54 Tachyzoites are adapted for rapid proliferation and dissemination due to an active lytic cycle that is  
55 controlled at numerous stages by intracellular calcium ion ( $\text{Ca}^{2+}$ ) signaling [8]. Artificially elevating  
56 intracellular  $\text{Ca}^{2+}$  using ionophores triggers secretion of microneme proteins, which are needed for substrate  
57 and cell attachment, and hence critical for both gliding motility and cell invasion [9-11]. Increase of cytosolic  
58  $\text{Ca}^{2+}$  released from internal stores is sufficient to trigger microneme secretion [12], and necessary for host cell  
59 invasion [12,13], although these processes are also enhanced by the presence of extracellular  $\text{Ca}^{2+}$  [14].  
60 Increases in intracellular  $\text{Ca}^{2+}$  also precede egress and drive secretion of perforin like protein 1 (PLP1) from  
61 microneme to facilitate rupture of parasitophorous vacuole membrane (PVM) followed by egress [15].  
62 Calcium signaling is initiated by cyclic guanosine monophosphate (cGMP)-generating guanylate cyclase (GC)  
63 [16-18] that activates parasite plasma membrane-associated protein kinase G (PKG) [19], stimulating the  
64 production of inositol triphosphate ( $\text{IP}_3$ ) by phosphoinositide-phospholipase C (PI-PLC) and leading to  
65 subsequent release of intracellular  $\text{Ca}^{2+}$  [12,20,21]. Recent studies in *Plasmodium* also implicate PKG in

66 directly controlling calcium through interaction with a multimembrane spanning protein that may function as  
67 a channel that mediates calcium release [22]. In turn,  $\text{Ca}^{2+}$  activates downstream  $\text{Ca}^{2+}$  responsive proteins  
68 including  $\text{Ca}^{2+}$  dependent protein kinases such as CDPK1 [8] and CDPK3 [23,24], and C2 domain containing  
69  $\text{Ca}^{2+}$  binding proteins [25], and calcium binding orthologues of calmodulin [26], which are required for  
70 invasion and egress by tachyzoites. Following invasion, protein kinase A catalytic domain 1 (PKAc1)  
71 dampens cytosolic  $\text{Ca}^{2+}$  by suppressing cGMP signaling and reducing  $\text{Ca}^{2+}$  uptake [27,28]. Collectively, the  
72 lytic life cycle of tachyzoites is orchestrated spatially and temporally by controlling levels of intracellular  $\text{Ca}^{2+}$   
73 and cyclic nucleotides [29].

74 *Toxoplasma* has evolved elaborate mechanism to control intracellular  $\text{Ca}^{2+}$  levels through the concerted  
75 action of calcium channels, transporters, and  $\text{Ca}^{2+}$  pumps expressed at the PM and intracellular stores [8,30].  
76 Orthologues to voltage dependent  $\text{Ca}^{2+}$  channels, transient receptor potential (TRP) channels, and plasma  
77 membrane type  $\text{Ca}^{2+}$ -ATPases (PMCA) are predicted to be present in *T. gondii* and likely involved in  
78 regulating cytosolic  $\text{Ca}^{2+}$  influx and efflux [31,32]. The endoplasmic reticulum (ER) is the most important  
79 storage site from which  $\text{Ca}^{2+}$  is released to stimulate motility and egress of *Toxoplasma* [8]. SERCA-type  $\text{Ca}^{2+}$   
80 ATPase is the known mechanism for  $\text{Ca}^{2+}$  uptake by the ER and its activity, which is inhibited by thapsigargin  
81 [33], leads to accumulation of  $\text{Ca}^{2+}$  in the ER, which when released activates microneme secretion and  
82 motility [34,35]. TgA1 a plasma membrane type  $\text{Ca}^{2+}$  ATPase, transport  $\text{Ca}^{2+}$  to the acidocalcisome [36],  
83 which likely provides a  $\text{Ca}^{2+}$  sink albeit one that may not be as readily mobilizable as the ER. In addition to  
84 internal  $\text{Ca}^{2+}$  stores, intracellular and extracellular *T. gondii* tachyzoites are capable of taking up  $\text{Ca}^{2+}$  from  
85 host cells and the extracellular environment, respectively, to enhance  $\text{Ca}^{2+}$  signaling pathways [14,37]. A  
86 variety of fluorescent  $\text{Ca}^{2+}$  indicators that have been developed to directly image  $\text{Ca}^{2+}$  signals in live cells  
87 include  $\text{Ca}^{2+}$  responsive dyes and genetically encoded indicators [38]. Indicators like Fluo-4/AM, and related  
88 derivatives, have been previously used to monitor  $\text{Ca}^{2+}$  levels in extracellular parasites [34,39]. Genetically  
89 encoded calcium indicators such as GCaMP5, GCaMP6f and GCaMP7 have also been used to visualize  
90 dynamic  $\text{Ca}^{2+}$  signals of both intracellular and extracellular tachyzoites with high resolution and sensitivity  
91 [37,40-42].

92 In contrast to tachyzoites, little is known about the roles of  $\text{Ca}^{2+}$  signaling in control of microneme  
93 secretion, gliding motility, and egress by bradyzoites. Although bradyzoites divide asynchronously, they  
94 undergo growth, expansion, and sequential rounds of tissue cyst formation and rupture that maintain chronic  
95 infection in vivo [5]. Histological studies in animal models support a model of periodic cyst rupture [43],  
96 releasing bradyzoites that reinvade new host cells to generate secondary daughter cysts [44], or transition back  
97 to actively replicating tachyzoites [45]. Development of bradyzoites has been studied in vitro using systems  
98 that induce development due to stress induced by alkaline pH [46] or in cell lines where development occurs  
99 spontaneously [47,48]. Although numerous studies have focused on the determinants that control stage  
100 conversion between tachyzoites and bradyzoites [6,49], few studies focus on the signaling pathways that  
101 control the bradyzoite lytic cycle.

102 In the present study, we combined stage-specific bradyzoite fluorescent reporters with  $\text{Ca}^{2+}$  imaging  
103 probes to explore  $\text{Ca}^{2+}$  signaling, microneme secretion, motility and egress by bradyzoites. Our findings  
104 indicate that bradyzoites exhibit dampened  $\text{Ca}^{2+}$  levels, reduced microneme secretion, and minimal egress in

105 response to  $\text{Ca}^{2+}$  agonists. Ratiometric  $\text{Ca}^{2+}$  imaging demonstrated lower  $\text{Ca}^{2+}$  basal levels and significantly  
106 lessened stored  $\text{Ca}^{2+}$  in ER and acidocalcisome in bradyzoites, associated with reduced expression of  $\text{Ca}^{2+}$   
107 ATPases responsible for maintaining intracellular stores replenished. Collectively our findings support a  
108 dampened lytic cycle in bradyzoites, arising from diminished  $\text{Ca}^{2+}$  signaling, which appears to be an  
109 adaptation for long-term intracellular existence.

110

## 111 **Results**

### 112 **$\text{Ca}^{2+}$ signaling triggers inefficient egress by bradyzoites**

113 To define egress by bradyzoites, we induced the differentiation of tachyzoites to bradyzoites by culture in  
114 HFF cells at alkaline pH (8.2) for 7 days. We treated both tachyzoite cultures and in vitro differentiated cysts  
115 with  $\text{Ca}^{2+}$  ionophore A23187 to trigger egress from parasitophorous vacuoles (PVs) or bradyzoite cysts, as  
116 detected by indirect immunofluorescence assay (IFA) or time lapse video microscopy. We observed that  
117 A23187 induced complete egress of tachyzoites from disrupted PVs while only few bradyzoites were released  
118 from cysts that remained largely intact (**Figure 1A**). This result was also confirmed by time-lapse video  
119 microscopy using the ME49 BAG1-mCherry strain either grown as tachyzoites (**Figure 1-video 1**) or  
120 bradyzoites (**Figure 1-video 2**). We quantified the percentage of tachyzoites or bradyzoites that were released  
121 during egress in response to A23187 or the agonist zaprinast, which is a cGMP specific phosphodiesterase  
122 (PDE) inhibitor that activates PKG-mediated  $\text{Ca}^{2+}$  signaling, leading to egress. In contrast to tachyzoites, we  
123 found significantly lower egress rate of bradyzoites in response to A23187 or zaprinast (**Figure 1B**). To  
124 examine the behavior of released parasites, we determined the maximum egress distance that parasites moved  
125 away from the original vacuole or cyst following egress. Tachyzoites migrated much further than bradyzoites  
126 after induced egress (**Figure 1C**). Bradyzoites also moved more slowly than tachyzoites (**Figure 1D**), as  
127 shown by quantification of their trajectories from time lapse video microscopy images. Taken together, these  
128 findings indicate that egress by bradyzoites in response to  $\text{Ca}^{2+}$  ionophore or zaprinast is incomplete and  
129 restricted.

130

### 131 **Calcium-mediated microneme secretion is dampened by bradyzoite development**

132 Egress by parasites requires  $\text{Ca}^{2+}$ -stimulated microneme secretion. To examine the reason for inefficient  
133 egress by bradyzoites, we monitored microneme secretion by quantitative secretion analysis of MIC2 fused  
134 with *Gaussia* Luciferase (Gluc). The *MIC2-Gluc* reporter was randomly integrated into the genome of the  
135 BAG1-mCherry strain (**Figure 2A**). IFA revealed that MIC2-Gluc was expressed and localized to  
136 micronemes in tachyzoites and bradyzoites induced for 7 days at pH 8.2 in vitro, as confirmed by expression  
137 of BAG1-mCherry (**Figure 2B**). BAG1-mCherry MIC2-GLuc strain tachyzoites, and bradyzoites liberated  
138 from cysts produced by cultivation for 7 days at pH 8.2 in vitro, were sorted by FACS (**Figure 2C**). FACS  
139 sorted tachyzoites and bradyzoites were treated with zaprinast or ionomycin, a  $\text{Ca}^{2+}$  ionophore that induces  
140 release of  $\text{Ca}^{2+}$  from the ER [50]. Bradyzoites secreted much less MIC2-Gluc protein compared to tachyzoites  
141 in response to  $\text{Ca}^{2+}$  agonists, zaprinast and ionomycin as shown by *Gaussia* luciferase assays performed on  
142 ESA fractions collected following stimulation (**Figure 2D**). To further investigate the process of microneme  
143 secretion by bradyzoites, we randomly integrated a mCherry secretion reporter, based on the signal peptide

144 sequence of ferredoxin-NADP(+)-reductase (FNR-mCherry), into the genome of BAG1-EGFP parasites  
145 (**Figure 2E**). The FNR-mCherry reporter is an improved version of DsRed reporter that is secreted into the  
146 matrix of PV, and released following the discharge of PLP1 in response to  $\text{Ca}^{2+}$  agonists [15]. Then we  
147 monitored the permeabilization of PV membrane or cyst wall after stimulation with A23187 based on the  
148 diffusion of FNR-mCherry using time-lapse fluorescence video microscopy. Consistent with previous reports  
149 [51], we observed that A23187 stimulated fast leakage of FNR-mCherry from the PV surrounding tachyzoites  
150 (**Figure 2F**, top panel and **Figure 2-video 1**). However, FNR-mCherry was not released from the cyst after  
151 A23187 stimulation (**Figure 2F**, bottom panel and **Figure 2-video 3**). As a control to confirm that the  
152 FNR-mCherry was indeed secreted into the lumen of the cyst matrix, we treated cysts with trypsin to release  
153 bradyzoites. Once the cyst wall was digested, the FNR-mCherry dissipated rapidly, confirming that it was  
154 present in the matrix of the cyst (**Figure 2F**, middle panel and **Figure 2-video 2**). These data were also  
155 confirmed by plotting FNR-mCherry fluorescence intensity changes vs. time for tachyzoites vs. intact or  
156 trypsin treated cysts (**Figure 2G**). These findings demonstrate dampened microneme secretion by bradyzoites,  
157 which may explain their incomplete egress.

158

### 159 **Genetically encoded calcium reporter reveals dampened $\text{Ca}^{2+}$ responses in bradyzoites**

160 To investigate  $\text{Ca}^{2+}$  signaling in bradyzoites, we established a dual fluorescent reporter system containing  
161 constitutively expressed GCaMP6f and mCherry under the control of bradyzoite stage-specific promoter  
162 BAG1 (**Figure 3A**). Using this system, both tachyzoites and bradyzoites express the same levels of GCaMP6f,  
163 while only bradyzoites express mCherry, allowing specific monitoring of calcium signals in both stages. We  
164 compared the response of BAG1-mCherry GCaMP6f reporter parasites that were grown as tachyzoites, to  
165 those induced to form bradyzoites by cultivation in HFF cells for 7 days at pH 8.2 in vitro, after treatment  
166 with calcium ionophore A23187. A23187 induced rapid and high-level increases in GCaMP6f fluorescence in  
167 tachyzoites but delayed and much weaker responses in bradyzoites as monitored by time lapse video  
168 microscopy (**Figure 3B**, **Figure 3-video 1** and **Figure 3-video 2**). To determine the effect of bradyzoite  
169 development on  $\text{Ca}^{2+}$  signaling, we treated intracellular tachyzoites, vs. bradyzoites induced by cultivation in  
170 HFF cells at pH 8.2 in vitro for 4 to 7 days, and quantified time of each tachyzoite vacuole or bradyzoite cyst  
171 to reach  $\text{Ca}^{2+}$  peak level after addition of A23187 ionophore by video microscopy. Increasing time of  
172 bradyzoites development was associated with progressively longer times to reach peak fluorescence of  
173 GCaMP6f (**Figure 3C**). Time lapse recording of GCaMP6f fluorescence intensity ratio changes ( $F/F_0$ ) showed  
174 delayed  $\text{Ca}^{2+}$  increase and lower fold changes in bradyzoites compared with tachyzoites in response to  
175 A23187 stimulation (**Figure 3D**). Zaprinast also elicited slower  $\text{Ca}^{2+}$  increases and lower fold changes in  
176 bradyzoites compared with tachyzoites (**Figure 3E**). To better characterize  $\text{Ca}^{2+}$  responses of bradyzoites, we  
177 performed live video imaging using spinning disc confocal microscopy to distinguish individual bradyzoites  
178 within in vitro differentiated cysts and identify motile bradyzoites within cysts by comparing consecutive  
179 images (**Figure 3F**). Motile bradyzoites were also observed to have higher GCaMP6f signals and these  
180 typically oscillated over time. In response to  $\text{Ca}^{2+}$  agonists, intracellular bradyzoites showed reduced  
181 percentages of motility compared to tachyzoites (**Figure 3G**). In summary,  $\text{Ca}^{2+}$  dynamics are delayed and  
182 reduced in bradyzoites in response to  $\text{Ca}^{2+}$  agonists.

183

184 **Bradyzoites formed in skeletal muscle cell and within ex vivo cysts show diminished Ca<sup>2+</sup> responses**

185 To rule out the possibility that alkaline pH stress used for differentiation resulted in lowered Ca<sup>2+</sup> signals in  
186 bradyzoites, we examined Ca<sup>2+</sup> signaling in bradyzoites within cysts that formed naturally in differentiated  
187 C2C12 myocytes. Differentiated myocytes stained positively for skeletal myosin, and facilitated the  
188 development of bradyzoites, as shown using the bradyzoite stage-specific protein BAG1 (**Figure 4A**). We  
189 tested Ca<sup>2+</sup> responses of bradyzoites formed in muscle cells using the dual fluorescent reporter GCaMP6f  
190 BAG1-mCherry parasites in response to A23187 or zaprinast by time-lapse video recording. Time-lapse  
191 imaging showed slow increase of GCaMP6f fluorescence in response to A23187 in tissue cysts formed in  
192 C2C12 myocytes (**Figure 4B**). Both the rate of increase and the maximum amplitude of the GCaMP6f signal  
193 was much lower in bradyzoites differentiated in myocytes compared to tachyzoites cultured in  
194 undifferentiated myoblasts (**Figure 4C**). The time to reach the peak GCaMP6f fluorescence was also delayed  
195 in bradyzoites formed in C2C12 myocytes compared with tachyzoites grown in myoblasts (**Figure 4D**).  
196 Bradyzoites cultured in C2C12 myocytes show significantly lower motility in response to A23187 and  
197 zaprinast when compared with tachyzoites (**Figure 4E**).

198 To further examine Ca<sup>2+</sup> signaling in bradyzoites, we harvested tissue cysts containing BAG1-mCherry  
199 GCaMP6f bradyzoites from the brains of chronically infected CD-1 mice and investigated their responses ex  
200 vivo. Video microscopy of ex vivo tissue cysts showed slow increases in GCaMP6f fluorescence in response  
201 to A23187 or zaprinast (**Figure 4F**). The ratio of GCaMP6f fluorescence changes vs time (F/F<sub>0</sub>) from  
202 bradyzoites within ex vivo cysts demonstrated lower and slower changes, consistent with lower Ca<sup>2+</sup> levels,  
203 compared with extracellular tachyzoites in response to Ca<sup>2+</sup> agonists (**Figure 4G**). In comparing the response  
204 of extracellular, ex vivo tissue cysts (**Figure 4 F,G**) to intracellular cysts formed during infection of C2C12  
205 myocytes (**Figure 4 B,C**), it was evident that the extracellular cysts respond somewhat faster, albeit still much  
206 slower than tachyzoites. This intermediate level of response was also seen in in vitro differentiated tissue cyst  
207 (produced by cultivation in HFF cells at pH 8.2 for 7 days) that were liberated from HFF cells and tested in  
208 vitro (**Figure 4-supplement 1**). Next, we measured the percentage of motile and egressed bradyzoites within  
209 ex vivo tissue cyst treated with A23187 and zaprinast. Strikingly, no egressed bradyzoites were observed  
210 although all the bradyzoites within ex vivo cysts became motile after stimulation (**Figure 4H, Figure 4-video**  
211 **1, Figure 4-video 2**). Taken together, these findings indicate that bradyzoites formed spontaneously in muscle  
212 myocytes and within ex vivo cysts from chronically infected mice display dampened Ca<sup>2+</sup> dynamics when  
213 treated with Ca<sup>2+</sup> agonists.

214

215

216 **Bradyzoites store less Ca<sup>2+</sup> in ER and acidocalcisome**

217 The cyst wall surrounding bradyzoites may restrict access to Ca<sup>2+</sup> agonists and hence dampen signals from  
218 GCaMP6f in response to Ca<sup>2+</sup> agonists in the studies described above. To test this possibility, we monitored  
219 GCaMP6f fluorescence changes in extracellular bradyzoites vs. tachyzoites of the BAG1-mCherry GCaMP6f  
220 strain by live imaging. Bradyzoites were induced by cultivation in HFF cells at pH 8.2 for 7 days and liberated  
221 from cysts by trypsin treatment, followed by washing and resuspension for analysis. We also observed slower

222 increases in GCaMP6f fluorescence intensity in bradyzoites (**Figure 5-video 2**) compared with tachyzoites  
223 (**Figure 5-video 1**) in response to A23187 (**Figure 5A**). Quantitative analysis of  $\text{Ca}^{2+}$  fluorescence changes  
224 ( $F/F_0$ ) after stimulation by A23187 and zaprinast showed slower  $\text{Ca}^{2+}$  responses in extracellular bradyzoites  
225 when compared to tachyzoites (**Figure 5B**). To confirm that extracellular bradyzoites were viable after  
226 liberation from in vitro cultured cysts by trypsin treatment, we utilized SYTOX far red, which is a DNA dye  
227 excluded by intact membranes of viable cells. In contrast to bradyzoites that were formaldehyde-fixed as a  
228 positive control, extracellular bradyzoites were not stained by SYTOX after the liberation from in vitro cysts  
229 (**Figure 5C**), indicating they were still viable after trypsin treatment.

230 We hypothesized that bradyzoites might have dampened GCaMP6f responses because they fail to release  
231  $\text{Ca}^{2+}$  from these intracellular stores. We tested  $\text{Ca}^{2+}$  responses of BAG1-mCherry and GCaMP6f -expressing  
232 bradyzoites and tachyzoites treated with ionomycin, which releases  $\text{Ca}^{2+}$  from the ER [50], thapsigargin,  
233 which blocks  $\text{Ca}^{2+}$  influx into ER by inhibiting SERCA-type  $\text{Ca}^{2+}$ -ATPase [33], and  $\text{NH}_4\text{Cl}$ , an alkalizing  
234 reagent that releases  $\text{Ca}^{2+}$  from acidocalcisomes [35]. Both ionomycin and thapsigargin induced delayed and  
235 lower amplitude changes in GCaMP6f fluorescence in bradyzoites vs. tachyzoites as shown by plotting  
236 fluorescence intensity fold changes ( $F/F_0$ ) vs. time (**Figure 5D**), indicative of lower ER stored  $\text{Ca}^{2+}$ . In  
237 contrast, bradyzoites treated with  $\text{NH}_4\text{Cl}$  showed no meaningful change in GCaMP6f fluorescence, suggesting  
238 they lack mobilizable  $\text{Ca}^{2+}$  in acidocalcisomes (**Figure 5D**). To rule out the possibility that the  $\text{Ca}^{2+}$  indicator  
239 GCaMP6f is less sensitive in bradyzoites due to some intrinsic defect, we loaded BAG1-mCherry expressing  
240 tachyzoite or bradyzoites with the  $\text{Ca}^{2+}$  sensitive vital dye Fluo-8 AM and used these cells for imaging. Fluo-8  
241 AM bradyzoites displayed dampened  $\text{Ca}^{2+}$  signaling after stimulation by ionomycin, thapsigargin or  $\text{NH}_4\text{Cl}$ ,  
242 relative to tachyzoites that responded normally (**Figure 5E**). Collectively, these findings indicate that  
243 bradyzoites are less able to mobilize  $\text{Ca}^{2+}$  from the ER and acidocalcisome in response to agonists.

244

#### 245 **Ratiometric sensor reveals reduced basal levels of $\text{Ca}^{2+}$ and dynamics in bradyzoites**

246 To more precisely compare  $\text{Ca}^{2+}$  levels in tachyzoites and bradyzoites, we constructed a ratiometric  
247 fluorescence reporter by co-expression of GCaMP6f with blue fluorescent protein mTagBFP2 linked by a P2A  
248 split peptide (**Figure 6A**, **Figure 6 Supplement 1A**, **Figure 6 Supplement 1B**). Because both proteins are  
249 co-expressed from the same promoter, the mTagBFP2 serves as a control for expression level, as mTagBFP2  
250 is non-responsive to  $\text{Ca}^{2+}$  levels [52]. Live fluorescence microscopy showed simultaneous expression of  
251 GCaMP6f and mTagBFP2 in tachyzoites, and additionally mCherry in bradyzoites (**Figure 6B**). Equal  
252 expression of GCaMP6f (His tag) and mTagBFP2, as well as separation of tachyzoites and bradyzoite  
253 populations (detected with SAG1 and BAG1 respectively) was validated by western blotting (**Figure 6C**). To  
254 compare  $\text{Ca}^{2+}$  basal levels, we quantified the fluorescence intensity ratio  $F_{\text{GCaMP6f}}/F_{\text{mTagBFP2}}$  of intracellular and  
255 extracellular tachyzoites and bradyzoites in EC buffer with or without  $\text{Ca}^{2+}$ . We observed significant  
256 reductions in the fluorescence intensity ratio of both intracellular and extracellular bradyzoites relative to  
257 tachyzoites (**Figure 6D**), indicative of lower basal  $\text{Ca}^{2+}$  levels in bradyzoites. We next compared  $\text{Ca}^{2+}$   
258 dynamics of intracellular tachyzoites and bradyzoites in response to  $\text{Ca}^{2+}$  agonists ionomycin,  $\text{NH}_4\text{Cl}$  and  
259 thapsigargin. Changes in the fluorescence of GCaMP6f were much slower and of lower amplitude in  
260 bradyzoites relative to tachyzoites (**Figure 6E**). We also observed lower resting  $\text{Ca}^{2+}$  and peak levels in

261 extracellular bradyzoites compared to tachyzoites (**Figure 6F**), indicating lower activity or expression of  
262 cytoplasmic influx mechanisms like the PM entry or ER release channels. To understand the molecular basis  
263 for the reduced stored  $\text{Ca}^{2+}$  and responses in bradyzoites, we performed real-time PCR to compare mRNA  
264 expression levels of TgSERCA, which is the drug target of thapsigargin and transfers  $\text{Ca}^{2+}$  from the cytosol of  
265 parasites to ER, and TgA1, which plays important roles in the accumulation of  $\text{Ca}^{2+}$  in the acidocalcisome. We  
266 observed significant reduction in the relative expression level of TgSERCA and TgA1 in bradyzoites  
267 compared to tachyzoites (**Figure 6G**). Taken together, these findings indicate that bradyzoites have lower  
268 levels of stored  $\text{Ca}^{2+}$ , which is associated with the downregulation of  $\text{Ca}^{2+}$ -ATPases SERCA and A1.

269

### 270 **Calcium signaling plays a critical role in gliding motility of bradyzoites**

271 To test whether dampened  $\text{Ca}^{2+}$  signaling would still be sufficient to drive gliding motility of bradyzoites, we  
272 treated BAG1-mCherry GCaMP6f expressing cysts cultured in vitro with trypsin to liberate bradyzoites  
273 (**Figure 7A**). There were no obvious changes in the  $\text{Ca}^{2+}$  levels nor motility during trypsin treatment and  
274 release (**Figure 7B** and **Figure 7-video 1**). When we monitored the motility of released bradyzoites by  
275 time-lapse video microscopy, a number of bradyzoites underwent circular gliding (**Figure 7C** and **Figure**  
276 **7-video 2**) in patterns that were highly reminiscent of tachyzoite motility. Similar to previous descriptions of  
277 oscillating  $\text{Ca}^{2+}$  patterns in gliding tachyzoites [39], we observed fluctuations of GCaMP6f fluorescence  
278 intensities in single extracellular bradyzoites with gliding motility (**Figure 7D**).

279 Once released from the cysts, bradyzoites were bathed in excess free  $\text{Ca}^{2+}$  (~ 1.8 mM in EC buffer). We  
280 hypothesized that extracellular bradyzoites could take up  $\text{Ca}^{2+}$  from the extracellular environment and hence  
281 recover normal gliding motility. To test this idea, we determined the percentage of extracellular bradyzoites  
282 undergoing different types of gliding motility including twirling, circular, helical motility as well as  
283 non-productive Brownian movement. Quantitative analysis showed that bradyzoites underwent all forms of  
284 gliding motility, albeit with lower frequencies when compared with tachyzoites (**Figure 7E**). Interestingly, we  
285 observed that exogenous  $\text{Ca}^{2+}$  greatly enhanced the gliding motility of extracellular bradyzoites while very  
286 few bradyzoites were able to glide in the absence of exogenous  $\text{Ca}^{2+}$  (**Figure 7E**). To further characterize the  
287 role of  $\text{Ca}^{2+}$  signaling in bradyzoites motility, we treated cells with the  $\text{Ca}^{2+}$  chelator BAPTA-AM, the PKG  
288 inhibitor compound 1, and the CDPK1 inhibitor 3-MB-PP1 to block  $\text{Ca}^{2+}$  signaling in bradyzoites. All these  
289 inhibitors significantly impaired gliding motility of tachyzoites and bradyzoites (**Figure 7F** and **Figure 7G**),  
290 confirming a key role of  $\text{Ca}^{2+}$  signaling in parasite motility. Bradyzoites displayed shorter gliding distance  
291 compared with tachyzoites as determined by measurements of trail lengths detected with SAG1 (tachyzoite)  
292 vs. SRS9 (bradyzoites) (**Figure 7G**). In summary, despite having dampened  $\text{Ca}^{2+}$  stores and reduced  
293 responses to agonist when intracellular, extracellular bradyzoites rapidly regain  $\text{Ca}^{2+}$ -mediated motility prior  
294 to differentiation to tachyzoites.

295

### 296 **Discussion**

297 Calcium signaling plays important roles in the control of microneme secretion, gliding motility and egress  
298 of apicomplexan parasites and these pathways have been best characterized in the tachyzoite stage of *T. gondii*  
299 [8,30], although not widely explored outside of this model. Here we compared the responses of tachyzoites



300 and bradyzoites to  $\text{Ca}^{2+}$  ionophores and agonists that cause release of  $\text{Ca}^{2+}$  from intracellular stores and found  
301 that  $\text{Ca}^{2+}$  responses, microneme secretion, and egress by bradyzoites were all highly muted. Dampened  $\text{Ca}^{2+}$   
302 responses were evident in the responses of in vitro cysts differentiated under stress conditions, naturally  
303 occurring cysts formed in muscle cells, and tissue cysts purified from brains of chronically infected mice and  
304 tested ex vivo. Reduced responses were not simply a consequence of the intracellular environment, as similar  
305 dampened  $\text{Ca}^{2+}$  signals and microneme secretion were observed in single, extracellular bradyzoites.  
306 Ratiometric  $\text{Ca}^{2+}$  imaging revealed lower resting  $\text{Ca}^{2+}$  levels and reduced stored  $\text{Ca}^{2+}$  in the ER and  
307 acidocalcisome in bradyzoites, which is likely a reflection of down regulation of  $\text{Ca}^{2+}$ -ATPases involved in  
308 maintaining these stores replenished. Tissue cysts are characterized by a thick wall comprised of proteins and  
309 carbohydrates which may collectively impede signals and/or restrict egress mechanically. When cysts were  
310 digested by trypsin to release bradyzoites, they exhibited  $\text{Ca}^{2+}$ -dependent gliding motility that was enhanced  
311 by incubation in extracellular  $\text{Ca}^{2+}$ , demonstrating that they express a conserved mechanism for  $\text{Ca}^{2+}$  entry,  
312 albeit the pumping activity involved in filling the stores is muted. In summary, dampened calcium signaling  
313 suppress bradyzoites microneme secretion, gliding motility and egress, reflecting their adaptations that are  
314 well suited to the long-term intracellular lifestyle of these chronic stages.

315 Egress is a crucial step in the lytic cycle of apicomplexan parasites and this response requires sequential  
316 increases in cytoplasmic  $\text{Ca}^{2+}$ , secretion of micronemes, PV rupture, and activation of motility [53,54]. Our  
317 studies demonstrate that bradyzoites show minimal egress from in vitro differentiated cysts in response to  
318 agonists that normally trigger this response in tachyzoites (i.e.  $\text{Ca}^{2+}$  ionophores and zaprinast). We also  
319 demonstrate that bradyzoites are refractory to stimulation of microneme secretion using either an intracellular  
320 reporter monitoring the release of PLP1 based on the dispersion of FNR-mCherry from the cyst matrix, or a  
321 MIC2-GLuc reporter detecting secretion from extracellular bradyzoites purified by FACS. To explore the  
322 basis for these differences, we utilized a dual fluorescent reporter GCaMP6f BAG1-mCherry to monitor  
323 changes of cytosolic  $\text{Ca}^{2+}$  levels in bradyzoites. Calcium signaling was significantly dampened in bradyzoites  
324 as reflected in delayed  $\text{Ca}^{2+}$  spikes and lower magnitude of cytosolic  $\text{Ca}^{2+}$  levels in response to  $\text{Ca}^{2+}$  agonists.  
325 Reduced  $\text{Ca}^{2+}$  responses were also confirmed using bradyzoites naturally formed in C2C12 skeletal muscle  
326 cells and ex vivo cysts isolated from chronically infected mice, indicating that the dampened responses are not  
327 simply a consequence of alkaline pH stress during bradyzoites development in vitro. Additionally, we  
328 observed similar dampened responses from extracellular bradyzoites, indicating that decreased responses are  
329 not simply due to reduced permeability of intact cysts to agonists. To confirm these results, we also utilized  
330 Fluo-8/AM to monitor intracellular  $\text{Ca}^{2+}$  stores of bradyzoites and observed similar dampened responses.  
331 Finally, since  $\text{Ca}^{2+}$ -dependent fluorescence responses by GCaMP6f or Fluo-8 are only relative and subject to  
332 differences in protein or probe levels, we developed a ratiometric calcium reporter that contains GCaMP6f  
333 fused with self-cleavage tag P2A linked mTagBFP2 under the control of the same promoter. Ratiometric  
334 measurement of the GCaMP6f signal to the  $\text{Ca}^{2+}$  insensitive indicator mTagBFP2, determined that bradyzoites  
335 have lower resting  $\text{Ca}^{2+}$  levels and quantitatively decreased  $\text{Ca}^{2+}$  responses relative to tachyzoites in response  
336 to  $\text{Ca}^{2+}$  agonists. Collectively, these findings conclusively show that bradyzoites have reduced  $\text{Ca}^{2+}$  responses  
337 whether developed in vitro or in vivo and using a variety of independent methods to assess both  $\text{Ca}^{2+}$  levels  
338 and physiological responses.

339 Based on the above findings, it is likely that bradyzoites possess different mechanisms to control  $\text{Ca}^{2+}$   
340 homeostasis, including differences in expression of calcium channels, calcium pumps and calcium storage  
341 pools relative to tachyzoites. For example, our findings indicate that bradyzoites show reduced responses to  
342 ionomycin and thapsigargin, which release  $\text{Ca}^{2+}$  from the ER, and in response to  $\text{NH}_4\text{Cl}$ , which releases  $\text{Ca}^{2+}$   
343 from acidocalcisomes and likely other acidic stores [35,55]. Consistent with these dampened responses,  
344 bradyzoites showed significantly reduced expression of the  $\text{Ca}^{2+}$ -ATPases TgSERCA [34] and TgA1 [36],  
345 which are involved in transporting cytosolic  $\text{Ca}^{2+}$  into the ER and acidocalcisome, respectively. The reduced  
346 expression of these genes is also supported by prior data on stage-specific transcriptional differences  
347 (<http://Toxodb.org>). Additionally, there are a number of other  $\text{Ca}^{2+}$  ATPases or membrane ATPases in the *T.*  
348 *gondii* genome that show differential expression between tachyzoites and bradyzoites (<http://Toxodb.org>), and  
349 these gene products may also contribute to the phenotypic differences described here. Additionally, it is  
350 possible that the reduced levels of  $\text{Ca}^{2+}$  in bradyzoites reflect limitations on the availability of  $\text{Ca}^{2+}$  from the  
351 host cell, since prior studies have shown that tachyzoites acquire their intracellular  $\text{Ca}^{2+}$  from this source [37].  
352 Further studies will be needed to decipher the contribution of these various mechanism to altered calcium  
353 homeostasis and signaling in bradyzoites.

354 Bradyzoites are surrounded by a cyst wall that is comprised of an outer thin compact layer and an inner  
355 sponge-like layer that faces the cyst matrix [56]. The cyst wall is enriched in dense granule proteins [57],  
356 stage-specific glycoproteins such as CST1 [58,59], and partially characterized carbohydrates [60]. It is likely  
357 that this architecture creates a barrier to egress since bradyzoites were able to activate motility but not to  
358 efficiently emerge from intact cysts. We utilized trypsin to digest the cyst wall, mimicking the cyst rupture  
359 observed in chronically infected mice or following oral ingestion and exposure to pepsin [43,61]. Notably,  
360 proteolytic release did not result in immediate changes in  $\text{Ca}^{2+}$  nor motility in the parasite, suggesting that cyst  
361 wall degradation does not trigger a process akin to egress in tachyzoites. Rather, when artificially released in  
362 this manner, a subset of bradyzoites spontaneously underwent gliding motility associated with  $\text{Ca}^{2+}$   
363 oscillations that were similar to those previously described for tachyzoites [39]. When incubated with  
364 extracellular  $\text{Ca}^{2+}$ , the percentage of motile bradyzoites increased, suggesting that  $\text{Ca}^{2+}$  entry may contribute to  
365 the cytosolic  $\text{Ca}^{2+}$  increases needed to stimulate motility, similar to tachyzoites [41]. Previous in vitro studies  
366 have shown that similar motile bradyzoites released from ruptured cysts have the ability to re-invade new host  
367 cells, establishing new cysts without an intermediate growth stage as tachyzoites [62]. Previous studies  
368 describing dynamically fluctuating cyst burdens over time and appearance of cyst clusters in chronically  
369 infected mice [5,63,64], suggest that a similar process of turnover may occur in vivo. The mechanisms  
370 inducing cyst wall turnover in vivo are unclear, although host cell macrophages were reported to secrete  
371 chitinase to lyse cysts in vitro [65]. Additionally, proximity biotinylation has shown the presence of GRA56,  
372 which is predicated to belong to melibiase family of polysaccharide degrading enzymes, on the cyst wall [66].  
373 Collectively, these findings suggest that synthesis and degradation of polysaccharides likely contribute both to  
374 cyst wall maturation and turnover in vivo. Our in vitro studies suggest that once the cyst wall is ruptured,  
375 bradyzoites respond to higher levels of calcium in the extracellular environment to regain motility and likely  
376 subsequent cell invasion, as supported by studies showing that CDPK1 inhibitors are active against chronic  
377 infection [67].

378 In summary, our work examines the role of  $\text{Ca}^{2+}$  in gliding motility, microneme secretion and egress by  
379 bradyzoites, and provides mechanistic explanations for their altered homeostasis and response to  $\text{Ca}^{2+}$   
380 ionophores and agonists. Our studies reveal that  $\text{Ca}^{2+}$  signaling is dampened during bradyzoite development  
381 both in vitro and ex vivo, as a result of down-regulated  $\text{Ca}^{2+}$  storage mechanisms resulting in reduced  
382 responsiveness. This altered physiological state may also be reflected by limitations of available  $\text{Ca}^{2+}$  from the  
383 host cell within the tissue cyst. Reduced  $\text{Ca}^{2+}$  stores and the ensuing dampened  $\text{Ca}^{2+}$  signaling impair  
384 microneme secretion, decrease gliding motility and prevent egress. Overall, this altered role for  $\text{Ca}^{2+}$  signaling  
385 may reflect the long-term sessile nature of the intracellular cyst, which is designed to prolong chronic  
386 infection.

387

## 388 **Materials and Methods**

### 389 **Cell culture**

390 *Toxoplasma gondii* tachyzoites were passaged in confluent monolayers of human foreskin fibroblasts (HFFs)  
391 obtained from the Boothroyd laboratory at Stanford University. The ME49  $\Delta h x g p r t :: F l u c$  type II strain of *T.*  
392 *gondii* [68] was used as parental strain for genetic modification. Tachyzoites were cultured in Dulbecco's  
393 modified Eagle's medium (DMEM; Life Technologies) pH 7.4, supplemented with 10% fetal bovine serum  
394 (FBS), penicillin, and streptomycin (Life Technologies) at 37°C in 5%  $\text{CO}_2$ . For in vitro induction of  
395 bradyzoites, parasites with cultured in alkaline medium in ambient  $\text{CO}_2$  as described previously [69]. In brief,  
396 infected HFF monolayers were switched to RPMI 1640 medium (MP Biomedicals) buffered to pH 8.2 with  
397 HEPES and supplemented with 5% FBS and cultured at 37°C in ambient  $\text{CO}_2$ , during which time the alkaline  
398 medium was changed every 2 days. For spontaneous induction of bradyzoites, C2C12 muscle myoblast cells  
399 (ATCC® CRL-1772™) were maintained in DMEM supplemented with 20% FBS. C2C12 myoblast  
400 differentiation and myotube formation were induced in DMEM containing 2% horse serum (Biochrom) by  
401 cultivation at 37°C in 5%  $\text{CO}_2$  for 5 days. Tachyzoites were inoculated into the differentiated muscle cells and  
402 cultured for another 7 days to induce bradyzoite formation, during which time the induction medium was  
403 changed every 2 days. For harvesting bradyzoites, infected monolayers were scraped into intracellular (IC)  
404 buffer (142 mM KCl, 5 mM NaCl, 1 mM  $\text{MgCl}_2$ , 5.6 mM D-glucose, 2 mM EGTA, 25 mM HEPES, pH 7.4)  
405 and released from cells by serially passing through 18g, 20g and 25g needles, followed by centrifugation  
406 (150g, 4°C) for 10 min. The pellet containing cysts was resuspended in IC buffer. Bradyzoites were liberated  
407 from cysts by digestion with 0.25 mg/ml trypsin at room temperature for 5 min, followed by centrifugation  
408 (150g, 4°C) for 10 min. The supernatant containing liberated bradyzoites was further centrifuged (400g, 4°C)  
409 for 10 min. The pellet containing purified bradyzoites was resuspended in extracellular (EC) buffer (5 mM  
410 KCl, 142 mM NaCl, 1 mM  $\text{MgCl}_2$ , 5.6 mM D-glucose, 25 mM HEPES, pH 7.4) with (1.8 mM  $\text{Ca}^{2+}$ ) or  
411 without  $\text{CaCl}_2$ , as indicated for different assays and in the legends.

### 412 **Reagents and antibodies**

413 A23187, zaprinast, ionomycin, thapsigargin,  $\text{NH}_4\text{Cl}$ , Fluorescein isothiocyanate-conjugated *Dolichos biflorus*  
414 agglutinin (DBA), and BAPTA-AM were obtained from Sigma. Fluo-8 AM was obtained from Abcam.  
415 SYTOX™ Red Dead Cell Stain was obtained from Thermal Fisher. The compounds 3-MB-PP1 [51] and  
416 Compound 1 [42] were obtained as described previously. Trypsin was purchased from MP Biomedicals.

417 Primary antibodies include mouse mAb DG52 anti-SAG1 (provided by John Boothroyd), mouse mAb 6D10  
418 anti-MIC2 [70], rabbit anti-GRA7 [71], mouse mAb 8.25.8 anti-BAG1 (obtained from Louis Wiess), rabbit  
419 anti-BAG1 (obtained from Louis Wiess), mouse anti-c-myc (mAb 9E10, Life Technologies), mouse  
420 anti-acetylated Tubulin (mAb 6-11B-1, Sigma), rat anti-mCherry (mAb 16D7, Life Technologies), rabbit-anti  
421 SRS9 (obtained from John Boothroyd), rabbit anti-tRFP (Axxora), mouse anti-6XHis (mAbHIS.H8, Life  
422 Technologies). Secondary antibodies for immunofluorescence assays include goat anti-mouse IgG conjugated  
423 to Alexa Fluor-488, goat anti-rabbit IgG conjugated to Alexa Fluor-488, anti-mouse IgG conjugated to Alexa  
424 Fluor-568, goat anti-rat IgG conjugated to Alexa Fluor-568, goat anti-mouse IgG conjugated to Alexa  
425 Fluor-594 (Life Technologies). For Western blotting, secondary antibodies consisted of goat anti-mouse IgG,  
426 goat anti-rabbit IgG, or goat anti-rat IgG conjugated to LiCor C800 or C680 IR-dyes and detected with an  
427 Odyssey Infrared Imaging System (LI-COR Biotechnology).

## 428 **Generation of stable transgenic parasite lines**

### 429 *Dual calcium and bradyzoite reporter strain: BAG1-mCherry GCaMP6f*

430 A dual reporter stain designed to detect bradyzoite conversion and calcium fluctuations was generated in the  
431 ME49  $\Delta hxppt::Fluc$  strain [68]. We generated a plasmid named pNJ-26 that contains mCherry driven by the  
432 BAG1 promoter, the genetically encoded calcium indicator GCaMP6f under the control of Tubulin1 promoter,  
433 and selection marker cassette SAG1 promoter driving CAT. ME49  $\Delta hxppt::Fluc$  tachyzoites were transfected  
434 with 20  $\mu\text{g}$  pNJ-26 plasmid and selected with 20  $\mu\text{M}$  chloramphenicol. Single cell clones containing randomly  
435 integrated transgenes were confirmed by diagnostic PCR and by IFA staining. Primers are shown in  
436 Supplementary table 1.

### 437 *Bradyzoite reporter strain: BAG1-EGFP and BAG1-mCherry*

438 The BAG1 promoter and the mCherry open reading frame (ORF) were independently PCR amplified from  
439 pNJ-26 and the EGFP ORF was amplified from pSAG1:CAS9-U6:sgUPRT respectively. The BAG1 promoter  
440 fragment and EGFP ORF or mCherry (ORF) were cloned by NEBuilder HiFi DNA Assembly Cloning Kit  
441 (NEB, E5520S) into the vector backbone that was produced by double enzymatic digestion of  
442 pTUB1:YFP-mAID-3HA, DHFR-TS:HXGPRT using KpnI and NdeI. ME49  $\Delta hxppt::Fluc$  tachyzoites were  
443 transfected with 20  $\mu\text{g}$  pBAG1:EGFP, DHFR-TS:HXGPRT or pBAG1:mCherry, DHFR-TS:HXGPRT and  
444 selected with mycophenolic acid (MPA) (25  $\mu\text{g}/\text{ml}$ ) and 6-xanthine (6Xa) (50  $\mu\text{g}/\text{ml}$ ). Single cell clones  
445 containing randomly integrated transgenes were confirmed by diagnostic PCR and by IFA staining. Primers  
446 are shown in Supplementary table 1.

### 447 *MIC2 secretion reporter BAG1-mCherry MIC2-GLuc*

448 The bradyzoite reporter line BAG1-mCherry was transfected with 20  $\mu\text{g}$  of the previously described  
449 pMIC2:GLuc-myc, DHFR-TS plasmid [42] and selected with 3  $\mu\text{M}$  pyrimethamine (PYR). Single cell clones  
450 containing randomly integrated transgenes were confirmed by diagnostic PCR and by IFA staining.

### 451 *FNR-mCherry leakage reporter BAG1-EGFP FNR-mCherry*

452 The bradyzoite reporter line BAG1-EGFP was transfected with 20  $\mu\text{g}$  pTUB1:FNR-mCherry, CAT (provided  
453 by the Carruthers lab) and selected with 20  $\mu\text{M}$  chloramphenicol. Single cell clones containing randomly  
454 integrated transgenes were confirmed by diagnostic PCR and by IFA staining.

### 455 *Ratiometric reporter BAG1-mCherry GCaMP6f-P2A-mTagBFP2*

456 The ratiometric reporter strain was generated using targeted insertion with CRISPR/Cas9 using previously  
457 described methods [72] to add the blue fluorescent protein (BFP) downstream of the GCaMP6f protein in the  
458 strain BAG1-mCherry GCaMP6f. In brief, a single guide RNA (sgRNA) targeting the DHFR 3'UTR  
459 following the GCaMP6f coding sequence was generated in the plasmid pSAG1:CAS9-U6:sgUPRT [73]. The  
460 P2A-mTagBFP2 tagging plasmid was constructed by cloning a synthetic sequence containing a slit peptide  
461 (P2A) together with the blue fluorescent reporter mTagBFP2 (P2A-mTagBFP2) into the  
462 pTUB1:YFP-mAID-3HA, DHFR-TS:HXGPRT backbone by NEBuilder HiFi DNA Assembly Cloning Kit  
463 (NEB, E5520S) after double enzymatic digestion of KpnI and NdeI. Following this step, the SAG1 3'UTR  
464 was amplified from pNJ-26 and cloned into the tagging plasmid to replace DHFR 3'UTR by Gibson assembly  
465 (NEB, E5520S). BAG1-mCherry GCaMP6f reporter tachyzoites were co-transfected with 10  $\mu$ g of  
466 pSAG1::CAS9-U6::sgDHFR 3'UTR and 2  $\mu$ g of PCR amplified P2A-mTagBFP2-HXGPRT flanked with 40  
467 bp homology regions, as described previously [26]. Stable transfectants were selected with 25  $\mu$ g/ml MPA and  
468 50  $\mu$ g/ml 6Xa. Single cell clones containing targeted integrated transgenes were confirmed by diagnostic PCR  
469 and by IFA staining. Primers are shown in Supplementary table 1.

#### 470 **Time-lapse imaging of fluorescent reporter strains**

471 For time-lapse microscopy, extracellular parasites were added to glass-bottom culture dishes (MatTek), or  
472 intracellular parasites were grown in host cells attached glass-bottom culture dishes. Alternating phase and  
473 fluorescent images (at different intervals specific in the legends) were collected on a Zeiss AxioObserver Z1  
474 (Carl Zeiss, Inc.) equipped with an ORCA-ER digital camera (Hamamatsu Photonics) and a 20x EC  
475 Plan-Neofluar objective (N.A. 0.50)), 37°C heating unit, and LED illumination for blue, green, red and far red  
476 wavelengths. Spinning disk images were acquired with a 100x oil Plan-Apochromat (N.A. 1.46) objective  
477 using illumination from 488 nm and 561 nm solid state lasers (Zeiss) and Evolve 512 Delta EMCCD cameras  
478 (Photometrics) attached to the same Zeiss AxioObserver Z1 microscope. Images were acquired and analyzed  
479 using Zen software 2.6 blue edition (Zeiss). Fluorescent intensity changes ( $F/F_0$ ) vs. time were plotted with  
480 GraphPad Prism version 6 (GraphPad Software, Inc.).

#### 481 **Indirect immunofluorescence assay (IFA)**

482 Parasites grown in HFF monolayers on glass coverslips were fixed in 4% (v/v) formaldehyde in PBS for 10  
483 min, and permeabilized by 0.25% (v/v) Triton X-100 in PBS for 20 min, and blocked in 3% bovine serum  
484 albumin (BSA) in PBS. Monolayers were incubated with different primary antibodies and visualized with  
485 secondary antibodies conjugated to Alexa Fluors. Coverslips were sealed onto slides using ProLong™ Gold  
486 Antifade containing DAPI (Thermo Fisher Scientific). Images were captured using a 63x oil Plan-Apochromat  
487 lens (N.A. 1.4) on an Axioskop2 MOT Plus Wide Field Fluorescence Microscope (CarlZeiss, Inc). Scale bars  
488 and linear adjustments were made to images using Axiovision LE64 software (Carl Zeiss, Inc.).

#### 489 **Western Blotting**

490 Samples were prepared in 5X Laemmli buffer containing 100 mM dithiothreitol, boiled for 5 min, separated  
491 on polyacrylamide gels by SDS-PAGE, and transferred to nitrocellulose membrane. Membranes were blocked  
492 with 5% nonfat milk, probed with primary antibodies diluted in blocking buffer. Membranes were washed  
493 with PBS + 0.1% Tween 20, then incubated with goat IR dye-conjugated secondary antibodies (LI-COR  
494 Biosciences) in blocking buffer. Membranes were washed several times before scanning on a LiCor Odyssey

495 imaging system (LI-COR Biosciences).

#### 496 **Fluo-8 AM calcium monitoring**

497 Freshly harvested parasites were loaded with 500 nM Fluo-8 AM for 10 min at room temperature, followed by  
498 centrifugation at 400 g for 5 min and washing in EC buffer without Ca<sup>2+</sup>. Parasites were resuspended in EC  
499 buffer without Ca<sup>2+</sup> and added directly to glass-bottom culture dishes. After addition of agonists, time-lapse  
500 images were recorded and analyzed as described above.

#### 501 **Egress assay**

502 Infected cells were treated with 2 μM A23187 or 500 μM zaprinast for 15 min at 37°C. Following incubation,  
503 samples were stained by IFA using antibodies against SAG1 (mouse), GRA7 (rabbit), FITC-conjugated DBA  
504 or BAG1(rabbit) and followed by secondary antibodies conjugated to Alexa Fluors. Samples were examined  
505 by fluorescence microscopy and the percentages of egressed or released parasites per vacuole or cyst were  
506 determined at least for 20 vacuoles or cysts per experiment. The maximum egress distance of parasites from  
507 vacuole or cysts were measured from scanned tiff images in imageJ.

#### 508 **Flow cytometry**

509 ME49 BAG1-mCherry MIC2-GLuc reporter bradyzoites were induced for 7 days at pH 8.2, harvested in IC  
510 buffer as described above, and passed through 5 μm polycarbonate membrane filter. ME49 *Δhxgprt::Fluc*  
511 tachyzoites, cultured and harvested as indicated above, were used for gating. Approximately 1 x 10<sup>6</sup> parasites  
512 from each sample (ME49 BAG1-mCherry MIC2-GLuc reporter tachyzoites and ME49 BAG1-mCherry  
513 MIC2-GLuc reporter bradyzoites) were sorted on Sony SH800S Cell Sorter directly into 500 μl IC buffer  
514 followed by centrifugation. Flow cytometry data were processed using FlowJo version 10 (FLOWJO, LLC).

#### 515 **Collection of excretory-secretory antigens (ESA) and Gaussia Luciferase Assay**

516 FACS sorted MIC2-GLuc reporter tachyzoites and bradyzoites were suspended with EC buffer and incubated  
517 with different agonists at 37°C for 10 min. ESA was collected by centrifugation and mixed with Pierce™  
518 *Gaussia* Luciferase Glow Assay Kit reagent (Thermo Scientific™) and luminescence was detected using a  
519 Cytation 3 Cell Imaging Multimode Imager (BioTek Instruments, Inc.). Buffer control values were subtracted  
520 from their corresponding sample values to correct for background.

#### 521 **Real-time PCR**

522 RNA was extracted from ME49 *Δhxgprt::Fluc* tachyzoites and bradyzoites induced for 7 days at pH 8.2 using  
523 RNeasy Mini Kit (Qiagen) combined with QIAshredder (Qiagen) followed by DNA Removal using  
524 DNA-free™ DNA Removal Kit (Thermo Fisher) and subsequent reverse transcription using High-Capacity  
525 cDNA Reverse Transcription Kit (Thermo Fisher). Quantitative real-time PCR was performed on Applied  
526 Biosystems QuantStudio 3 Real-Time PCR System (Thermo Fisher) using SYBR® Green JumpStart™ Taq  
527 ReadyMix™ (Sigma) with primers shown in Supplementary table 1. Mean fold changes from two  
528 independent experiments were calculated from ΔΔ Ct values using actin1 transcript as housekeeping gene, as  
529 described previously [74].

#### 530 **Gliding trail assay**

531 Coverslips were precoated by incubation in 50% fetal bovine serum diluted in PBS for 1 h at 37°C followed  
532 by rinsing in PBS. Freshly harvested tachyzoites or bradyzoites were resuspended in EC buffer, treated with  
533 DMSO (0.1%, v/v), or inhibitors (in 0.1% DMSO, v/v) and then added to pre-coated glass coverslips and

534 incubated at 37°C for 15 min. Coverslips were fixed in 2.5% formalin in PBS for 10 min and the surface  
535 proteins were detected by IFA as above described using anti-SAG1 and anti-SRS9 antibodies as stage-specific  
536 markers for tachyzoites and bradyzoites, respectively. Gliding trails were captured by IFA microscopy as  
537 described above and the frequency of trails measured from tiff images using ImageJ.

#### 538 **Mouse infections and ex vivo cyst collection**

539 Mice were housed in an Association for Assessment and Accreditation of Laboratory Animal Care  
540 International-approved facility at Washington University School of Medicine. All animal studies were  
541 conducted in accordance with the U.S. Public Health Service Policy on Humane Care and Use of Laboratory  
542 Animals, and protocols were approved by the Institutional Animal Care and Use Committee at the School of  
543 Medicine, Washington University in St. Louis.

544 Eight weeks old female CD-1 mice (Charles River) were infected with 200 ME49 BAG1-mCherry GCaMP6f  
545 tachyzoites by intraperitoneal injection. After 30 days of infection, animals were sacrificed, the brain removed  
546 and homogenized and the number of brain cyst was determined by DBA staining and microscopy as  
547 previously described [69]. Eight week old female CD-1 mice (Charles River) were infected with 5 cysts from  
548 the brain homogenate by oral gavage. Following a 30-day period these mice were euthanized, and brain  
549 homogenate was collected and added to glass bottom dishes for live imaging of tissue cysts.

#### 550 **Statistical Analyses**

551 Statistical analyses were performed in Prims (GraphPad). Data that passed normally distribution were  
552 analyzed by one-way ANOVA or Student's t tests, while data that were not normally distributed, or contain too  
553 few samples to validate the distribution, were analyzed by Mann Whitney or Kruskal-Wallis non-parametric  
554 tests. \*,  $P < 0.05$ , \*\*,  $P < 0.01$ , \*\*\*,  $P < 0.001$ .

555

556 **Acknowledgements:** We thank Vern Carruthers for providing plasmids, Louis Wiess and John Boothroyd  
557 for providing antibodies, members of the Sibley lab for helpful advice, Wandy Beatty, Microbiology Imaging  
558 Facility, for technical assistance with microscopy, and Jenn Barks for tissue culture support. Supported in part  
559 by a grant from the NIH (AI#034036).

560

561 **Author Contributions:** Conceived and designed the experiments: Y.F., L.D.S.; Performed the experiments: Y.F.;  
562 Analyzed the data: Y.F., S.M., L.D.S.; Provided critical reagent and experimental advice: K.M.B., N.J., S.M.;  
563 Supervised the work S.M., L.D.S.; Wrote the manuscript: Y.F., L.D.S.; Edited the manuscript, all authors.

564

565 **Disclosures:** The authors have no conflicts to disclose.

566

567

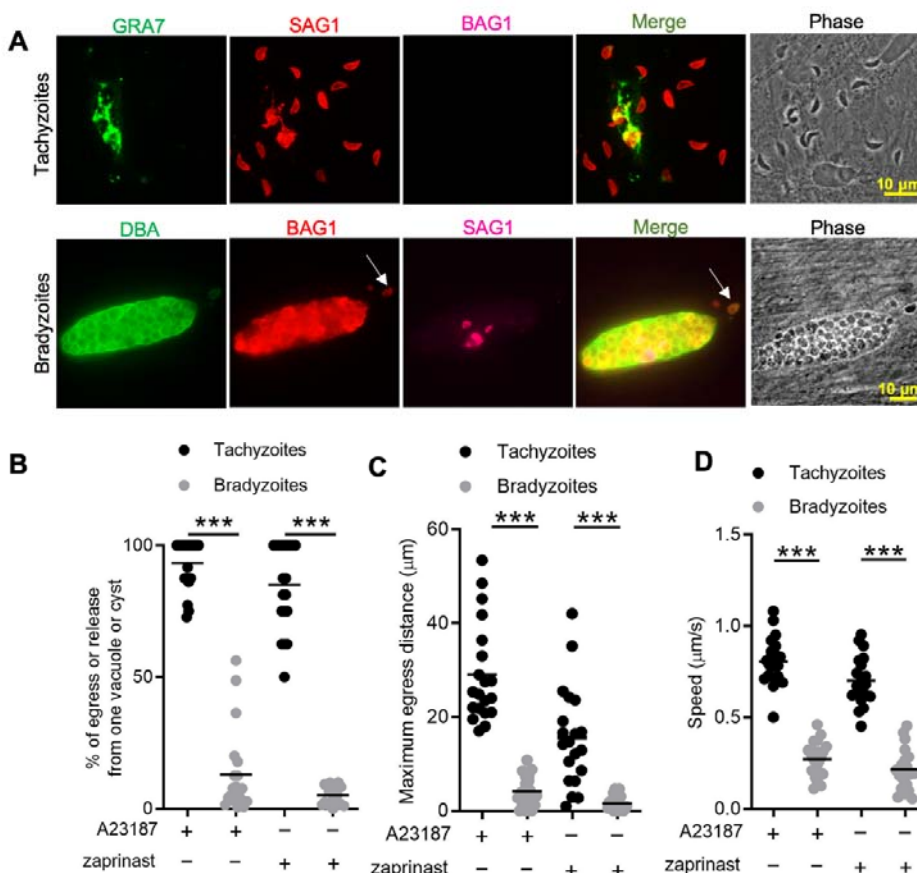

**Figure 1. In vitro**

568

569 **induced bradyzoites show limited egress in response to  $\text{Ca}^{2+}$  agonists.** (A) Egress of tachyzoites and  
 570 bradyzoites in response to A23187 (2  $\mu\text{M}$ ) for 15 min. Anti-GRA7, anti-SAG1, and anti-BAG1 antibodies  
 571 followed by secondary antibodies to Alexa conjugated fluorochromes were used to detect the parasitophorous  
 572 vacuole (PV) membrane, tachyzoites, and bradyzoites, respectively. DBA (*Dolichos biflorus* agglutinin)  
 573 conjugated to FITC was used to stain the cyst wall. Arrow indicates released bradyzoites. Scale bar = 10  $\mu\text{m}$ .  
 574 (B) Quantitative analysis of egress in response to A23187 (2  $\mu\text{M}$ ) or zaprinast (500  $\mu\text{M}$ ) in extracellular buffer  
 575 (EC) with  $\text{Ca}^{2+}$  for 15 min. Each data point represents the % of egressed or released parasites from one  
 576 parasitophorous vacuole (PV) or cyst (n=20). Means  $\pm$  SD of two independent experiments with 20 replicates.  
 577 Two-tailed Mann-Whitney test, \*\*\* $P < 0.001$ . (C) Quantitative analysis of maximum distance egressed or  
 578 released parasites moved away from the vacuole/cyst in response to A23187 (2  $\mu\text{M}$ ) or zaprinast (500  $\mu\text{M}$ ) in  
 579 EC buffer with  $\text{Ca}^{2+}$  for 15 min. Each data point represents distance travelled of one egressed tachyzoite or  
 580 released bradyzoite from the original PV or cyst (n=20). Means  $\pm$  SD of two independent experiments with 20  
 581 replicates. Two-tailed Mann-Whitney test, \*\*\* $P < 0.001$ . (D) Quantitative analysis of speed ( $\mu\text{m/s}$ ) of  
 582 egressed or released parasites in response to A23187 (2  $\mu\text{M}$ ) or zaprinast (500  $\mu\text{M}$ ) in EC buffer with calcium  
 583 for 15 min by time-lapse microscopy. Mean speed was determined by time lapse recording during the first 1  
 584 min after egress or release. Each data point represents migration speed of a single egressed tachyzoites or  
 585 released bradyzoites from original PV or cyst (n=20). Means  $\pm$  SD of two independent experiments with 20  
 586 replicates. Two-tailed unpaired Student's t test, \*\*\* $P < 0.001$ .

587

588



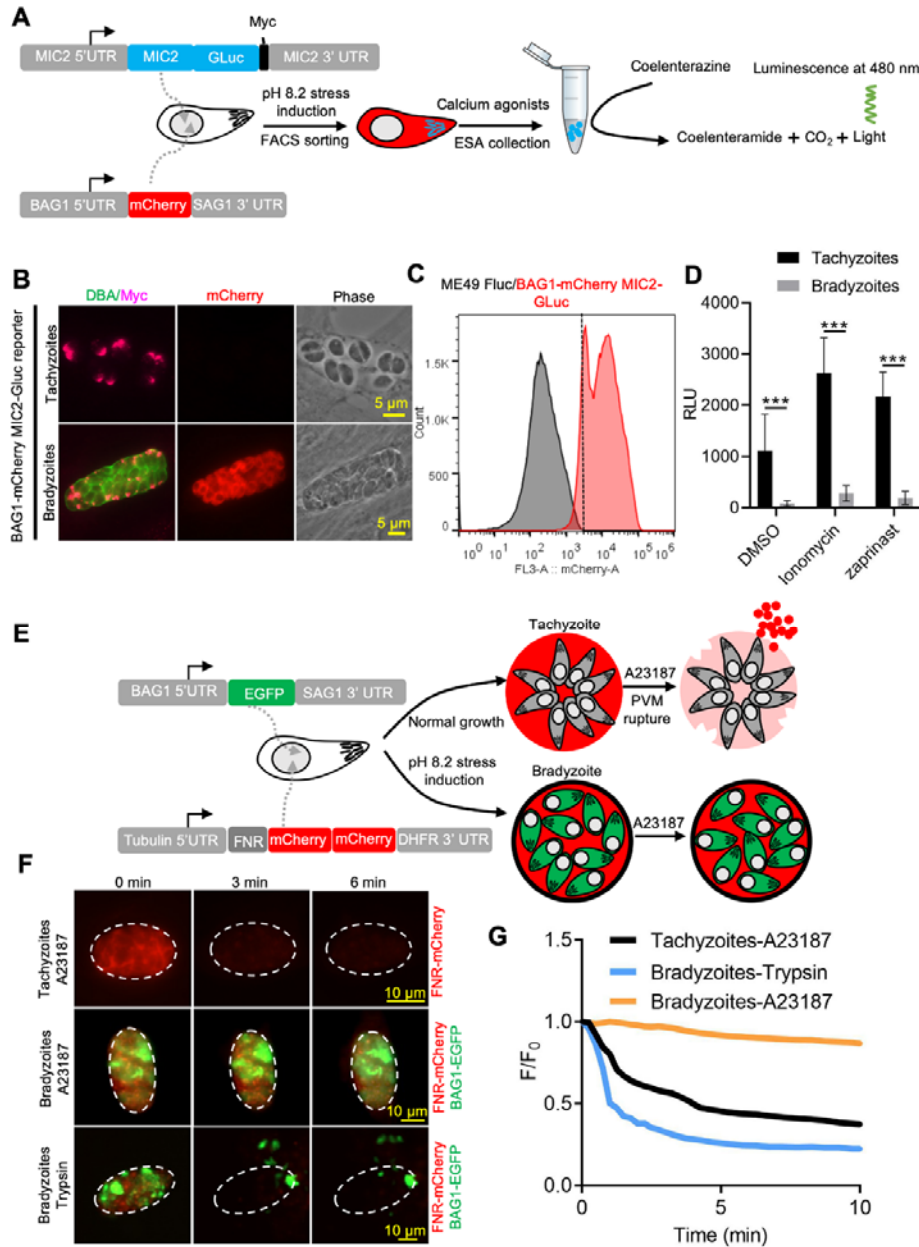

**Figure 2. Ca<sup>2+</sup>**

589

590 **dependent microneme secretion is significantly dampened in bradyzoites.** (A) Schematic of bradyzoites  
 591 MIC2 secretion assay using ME49 BAG1-mCherry MIC2-GLuc bradyzoites, differentiated in vitro by  
 592 cultivation at pH 8.2 for 7 days, based on fluorescence-activated cell sorting (FACS). (B) IFA analysis  
 593 showing localization of MIC2-Gluc in bradyzoites induced for 7 days at pH 8.2. MIC2-Gluc was stained with  
 594 anti-Myc antibody, bradyzoites were detected with anti-mCherry, followed by secondary antibodies  
 595 conjugated with Alexa Fluor dyes, and the cyst wall was stained with DBA-FITC. Bar = 5 μm. (C)  
 596 Bradyzoites expressing BAG1-mCherry were induced for 7 days at pH 8.2, mechanically liberated from cysts  
 597 by 0.25 mg/ml trypsin for 5 min in intracellular buffer (IC buffer) and collected by FACS after gating with  
 598 parental ME49 *Δhxgprt::Fluc* parasites. (D) ME49 BAG1-mCherry MIC2-GLuc tachyzoites or bradyzoites  
 599 sorted by FACS and resuspended in EC buffer with calcium were stimulated by 0.1% DMSO, ionomycin (1  
 600 μM) or zaprinast (500 μM) for 10 min at 37 °C. Release of MIC2-GLuc in ESA was determined using a  
 601 *Gaussia* luciferase assay. Means ± SEM of three independent experiments each with 3 replicates. Multiple

602 Student's t tests, \*\*\* $P < 0.001$ . (E) Schematic illustration of the FNR-mCherry BAG1-EGFP dual  
603 fluorescence reporter and leakage of FNR-mCherry from the PV (top) or cyst matrix (bottom) following  
604 A23187-induced membrane permeabilization. (F) FNR-mCherry leakage was monitored by time-lapse  
605 imaging of FNR-mCherry after A23187 (2  $\mu\text{M}$ ) treatment. FNR-mCherry BAG1-EGFP tachyzoites cultured  
606 under normal condition for 24 hr or bradyzoites induced for 7 days at pH 8.2 were treated with A23187 (2  $\mu\text{M}$ )  
607 or 0.25 mg/ml trypsin in EC buffer with calcium for 10 min at 37°C. Dash circle indicates the region of interest  
608 (ROI) for measurement of fluorescence intensity. Bar= 10  $\mu\text{m}$ . (G) FNR-mCherry fluorescence (F) over the  
609 initial signal ( $F_0$ ) vs. time from cells treated as in F. Curves are the mean data of 3 independent vacuoles or  
610 cysts. Bradyzoites treated with DMSO group was used to assess photobleaching of mCherry (grey line).  
611

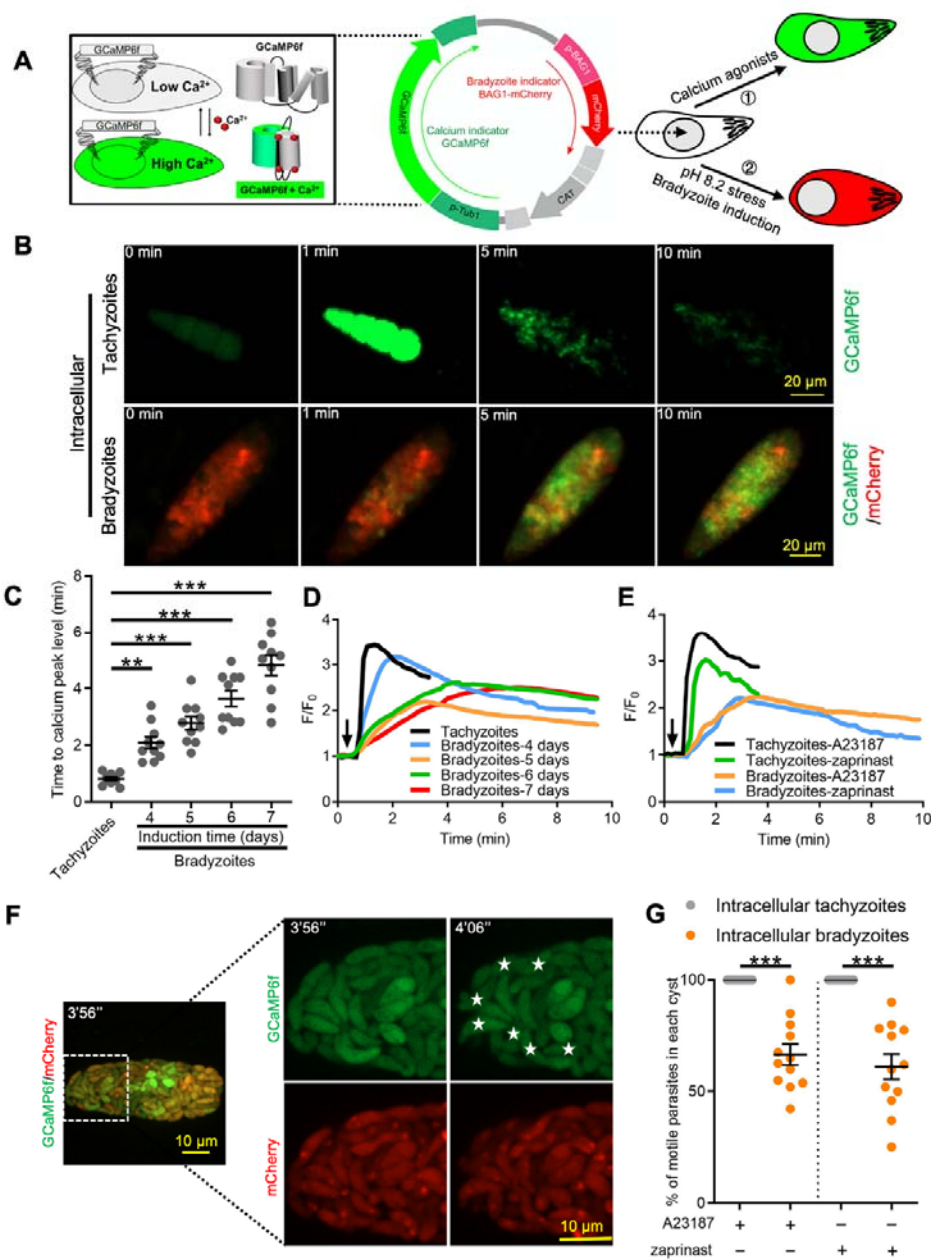

612

613 **signaling is dampened during in vitro bradyzoite development induced by alkaline pH.** (A) Schematic of

614 generation of BAG1-mCherry and GCaMP6f dual fluorescent reporter to monitor  $Ca^{2+}$  responses in

615 bradyzoites. (B) Time-lapse images BAG1-mCherry GCaMP6f tachyzoites cultured for 24 hr vs. bradyzoites

616 induced for 7 days at pH 8.2 in response to A23187 (2  $\mu M$ ) in EC buffer with  $Ca^{2+}$  for 10 min. Bar= 20  $\mu m$ .

617 (C) Time for reaching  $Ca^{2+}$  peak level in response to A23187 (2  $\mu M$ ) for BAG1-mCherry GCaMP6f

618 expressing tachyzoites and bradyzoites induced at pH 8.2. Data points of each group represent 10 cysts or

619 vacuoles. Means  $\pm$  SD of two independent experiments with 10 replicates each. One way ANOVA with

620 Dunn's multiple comparison correction test \*\*,  $P < 0.01$ , \*\*\*,  $P < 0.001$ . (D) Monitoring the relative intensity

621 of GCaMP fluorescence fold change ( $F/F_0$ ) vs. time for intracellular tachyzoites and in vitro induced

622 bradyzoites induced at pH 8.2. Cells were treated with A23187 (2  $\mu M$ ) in EC buffer without  $Ca^{2+}$  for 10 min.

623 Curves are the mean fluorescence intensity of 3 vacuoles or cysts. Arrow indicates time of addition of A23187.

**Figure 3.  $Ca^{2+}$**

624 (E) Monitoring the relative intensity of GCaMP fluorescence vs. time for intracellular tachyzoites and in vitro  
625 induced bradyzoites (5 days at pH 8.2). Cells were treated with A23187 (2  $\mu$ M) or zaprinast (500  $\mu$ M) in EC  
626 buffer with  $\text{Ca}^{2+}$ . Arrow indicates time of addition of agonists. Curves represent the mean data of 3  
627 independent cysts or vacuoles. (F) Live time-lapse imaging of BAG1-mCherry GCaMP6f bradyzoites induced  
628 for 7 days at pH 8.2 in response to A23187 (2  $\mu$ M) in EC buffer with calcium. Cells were imaged by spinning  
629 disc confocal microscopy after reaching calcium peak levels (left panel). Right panel showed its  
630 corresponding zoomed-in images. The interval between each two continuous images is 10 s, white asterisks in  
631 the latter image (4'06'') indicate motile bradyzoites by comparison with the former image (3'56''). Bar= 10  
632  $\mu$ m. (G) Motility of parasites within PVs or cysts was analyzed by time-lapse spinning disc confocal  
633 microscopy and tracking of individual parasites for 5 min after reaching  $\text{Ca}^{2+}$  peak levels in response to  
634 A23187 (2  $\mu$ M) or zaprinast (500  $\mu$ M) in EC buffer with calcium. Each data point represents parasites from  
635 one vacuole or cyst (n=10). Data come from two independent experiments. Two-tailed Mann-Whitney test,  
636 \*\*\* $P < 0.001$ . Lines and error bars represent means  $\pm$  SD of two independent experiments with 10 replicates  
637 each.

638

639

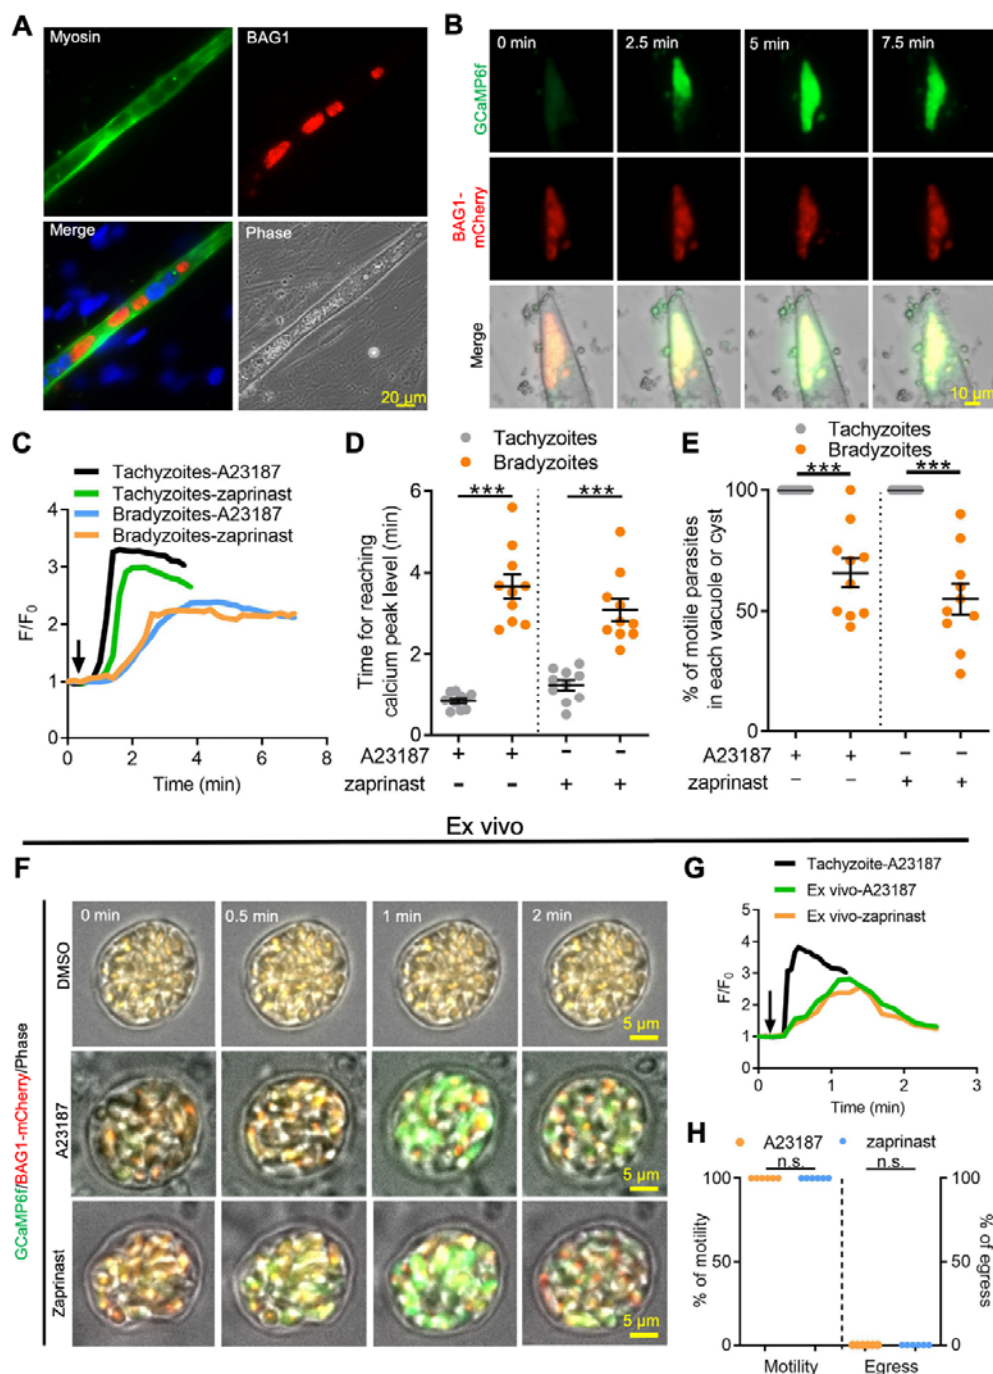

**Figure 4. Ca<sup>2+</sup>**

640

641 **signaling is dampened in in vitro bradyzoites from spontaneously formed cysts in C2C12 muscle cells**  
 642 **and cysts isolated from chronically infected mice. (A)** Microscopy based assay for detection of bradyzoites  
 643 naturally formed after 7 days culture of the BAG1-mCherry GCaMP6f expressing dual reporter strain in  
 644 differentiated C2C12 muscle cells. Anti-myosin antibody was used to confirm the differentiation of C2C12  
 645 cells while BAG1 was used to detect bradyzoites followed by secondary antibodies conjugated with Alexa  
 646 Fluor dyes. Bar = 20  $\mu$ m. (B) Time-lapse recording of GCaMP6f fluorescence intensity from cysts of the  
 647 BAG1-mCherry GCaMP6f strain naturally formed after 7 days culture in C2C12 cells. Cells were treated with  
 648 A23187 (2  $\mu$ M) in EC buffer with Ca<sup>2+</sup>. Bar = 10  $\mu$ m. (C) GCaMP6f fluorescence intensity changes vs. time  
 649 from tachyzoites cultured in undifferentiated myoblasts or cysts naturally formed after 10 days in

650 differentiated C2C12 cells in response to A23187 (2  $\mu$ M) or zaprinast (500  $\mu$ M) in EC buffer with calcium.  
651 Curves represent mean data of 3 independent cysts or vacuoles. (D) Time for reaching  $Ca^{2+}$  peak levels in  
652 tachyzoites cultured in undifferentiated myoblasts and bradyzoites formed after 10 days culturing in C2C12  
653 cells. Cells were treated with A23187 (2  $\mu$ M) or zaprinast (500  $\mu$ M) in EC buffer with calcium for 10 min.  
654 Data points of each group come from 10 cysts or vacuoles of two independent experiments. Two-tailed  
655 unpaired Student's t test, \*\*\* $P < 0.001$ . Lines represent means  $\pm$  SD of two independent experiments with 10  
656 replicates each. (E) Motility of parasites analyzed by time-lapse spinning disc confocal microscopy and  
657 tracking of individual parasites for 5 min after reaching calcium peak levels in response to A23187 (2  $\mu$ M) or  
658 zaprinast (500  $\mu$ M) in EC buffer with calcium. Lines represent means  $\pm$  SD of two independent experiments  
659 with 10 replicates each. Two-tailed Mann-Whitney t test, \*\*\* $P < 0.001$ . (F) Monitoring of GCaMP  
660 fluorescence in response to 0.1% DMSO, A23187 (2  $\mu$ M) or zaprinast (500  $\mu$ M) in EC buffer with  $Ca^{2+}$  in ex  
661 vivo cysts isolated from the brains of mice infected with BAG1-mCherry GCaMP6f reporter parasites. Cysts  
662 were harvested at 30 days post infection. Bar = 5  $\mu$ m. (G) GCaMP6f fluorescence intensity changes vs. time  
663 within BAG1-mCherry GCaMP6f ex vivo cysts in response to A23187 (2  $\mu$ M) or zaprinast (500  $\mu$ M) in EC  
664 buffer with calcium. Curves are the mean data of 3 independent cysts. (H) Quantitative analysis of motility  
665 and egress by bradyzoites from ex vivo cysts isolated from CD-1 mice brain tissues at 30 days post-infection.  
666 Motility was analyzed by time-lapse microscopy and tracking of individual parasites using time points similar  
667 to D, E above. Each data point represents percentage of motile or egressed parasites from one cyst (n=5).  
668 Significance was determined by two-tailed Student's t-test, n.s., not significant.

669

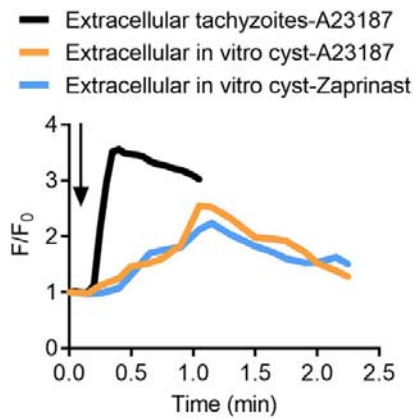

670

671 **Figure 4 figure supplement 1 Calcium responses by extracellular tachyzoites and in vitro produced**  
672 **tissue cysts**

673 (A) Fluorescence recording of ME49 strain parasites expressing GCaMP6f in response to A23187 (2  $\mu$ M) or  
674 zaprinast (500  $\mu$ M). Freshly harvested extracellular tachyzoites were compared to cysts induced in vitro in pH  
675 8.2 RPMI 1640 medium for 7 days. Arrow indicates time of addition of calcium agonists. Each kinetic curve  
676 represented mean data of 3 independent samples.

677

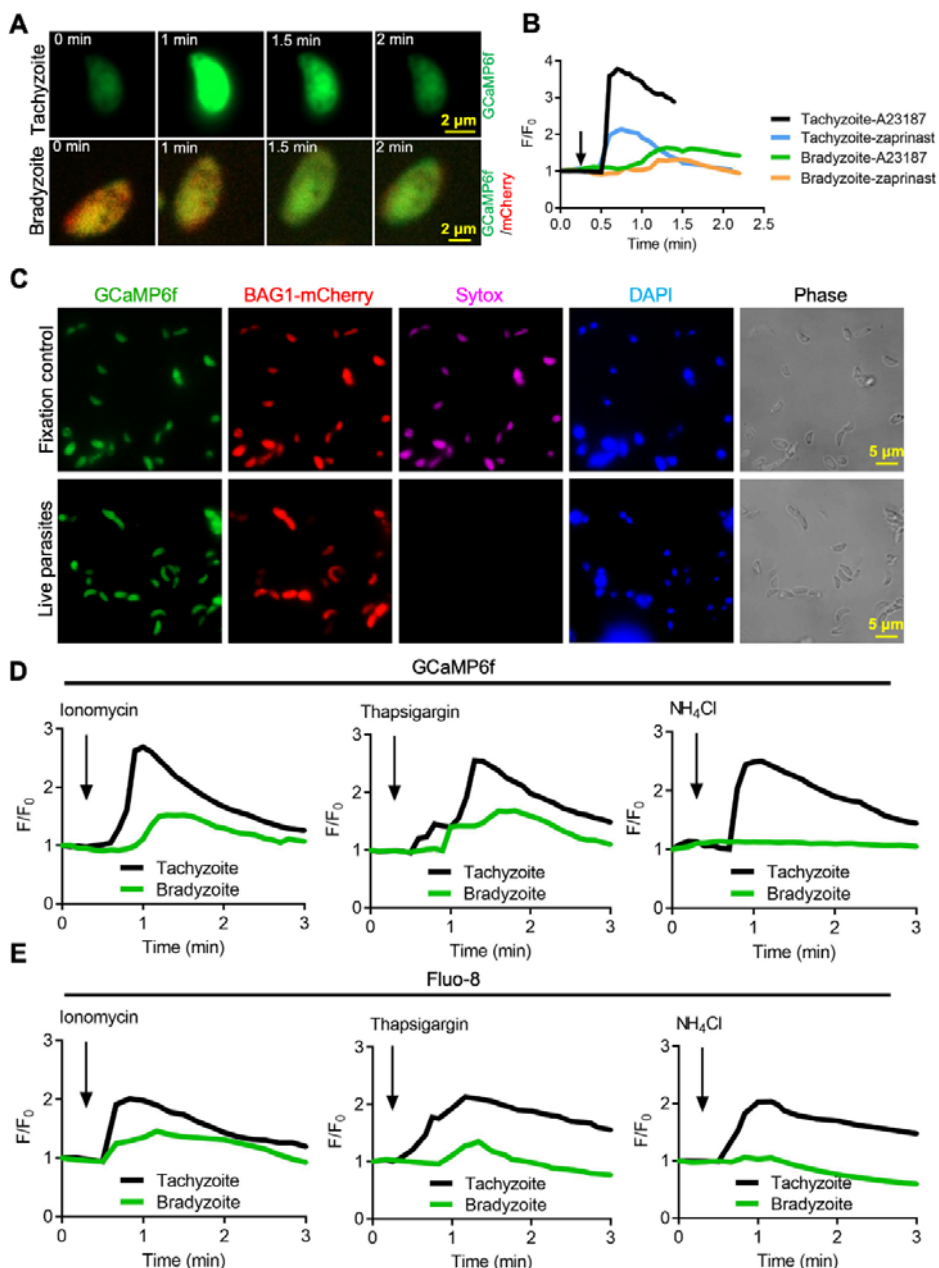

678

679 **Figure 5. Bradyzoites have lower  $\text{Ca}^{2+}$  stores and reduced responses to agonists compared to tachyzoites.**

680 (A) Live imaging of extracellular BAG1-mCherry GCaMP6f dual fluorescent reporter tachyzoites and  
681 bradyzoites induced for 7 days at pH 8.2 in response to A23187 (2  $\mu\text{M}$ ) in EC buffer with  $\text{Ca}^{2+}$ . Bar= 2  $\mu\text{m}$ . (B)  
682 Fluorescence recording of increased GCaMP6f fluorescence with  $\text{Ca}^{2+}$  increase in response to A23187 (2  $\mu\text{M}$ )  
683 or zaprinast (500  $\mu\text{M}$ ) in EC buffer with  $\text{Ca}^{2+}$  for extracellular tachyzoites and bradyzoites. Arrow indicates  
684 the addition of calcium agonists. Each curve is the mean of three individual parasites. (C) BAG1-mCherry  
685 GCaMP6f reporter live bradyzoites were stained by SYTOX<sup>TM</sup> far red to detected dead cells and DAPI 30 min  
686 after liberation from cysts. Formaldehyde-fixed bradyzoites serve as positive control. Bar= 5  $\mu\text{m}$ . (D)  
687 GCaMP6f fluorescence intensity vs. time for extracellular BAG1-mCherry GCaMP6f dual reporter parasites  
688 in response to 1  $\mu\text{M}$  ionomycin, 1  $\mu\text{M}$  thapsigargin, or 10 mM  $\text{NH}_4\text{Cl}$  in EC buffer without  $\text{Ca}^{2+}$ . Arrow  
689 indicates the addition of agonist. Each curve is the mean of three individual parasites. (E) Fluorescence



690 intensities change fold vs. time of extracellular BAG1-mCherry expressing bradyzoites loaded with 500 nM  
691 Fluo-8 AM after addition of 1  $\mu$ M ionomycin, 1  $\mu$ M thapsigargin or 10 mM  $\text{NH}_4\text{Cl}$  in EC buffer without  $\text{Ca}^{2+}$ .  
692 Arrow indicates the addition of agonist. Each curve is the mean of three individual parasites.

693

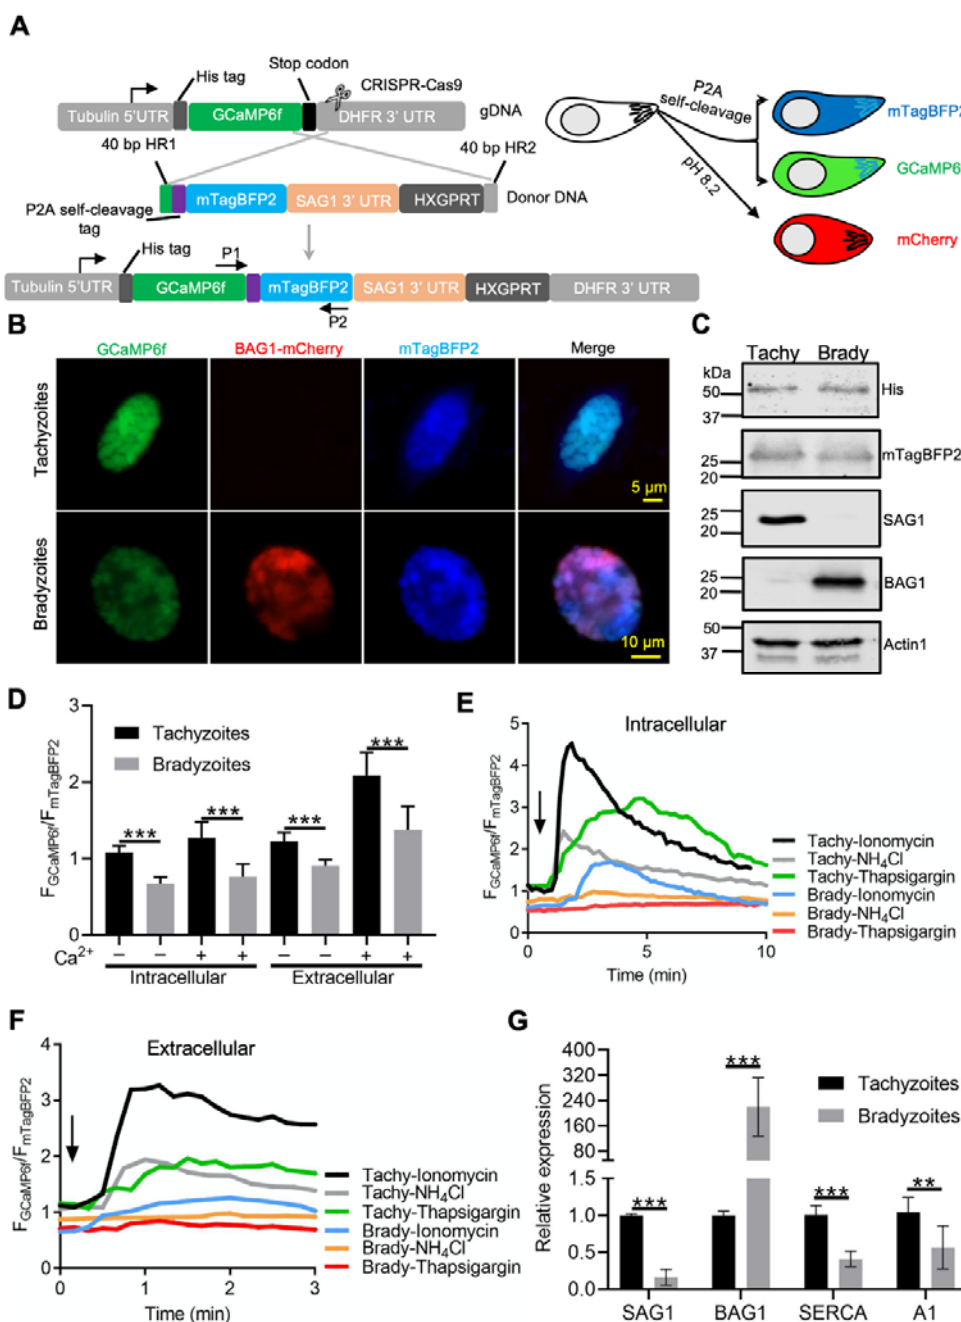

**Figure 6.**

694

695 **Ratiometric  $Ca^{2+}$  imaging of bradyzoites reveals lower levels of resting  $Ca^{2+}$  and reduced response to**  
 696  **$Ca^{2+}$  ionophores compared to tachyzoites.** (A) Schematic diagram of generation of a ratiometric calcium  
 697 reporter containing GCaMP6f fused with by a peptide P2A and blue fluorescence indicator mTagBFP2 in the  
 698 background of BAG1-mCherry reporter strain. (B) Fluorescence microscopy imaging of intracellular  
 699 ratiometric indicator expressed by tachyzoites cultured for 24 hr vs. bradyzoites induced for 7 days at pH 8.2  
 700 culture in EC buffer without  $Ca^{2+}$ . Bar = 10  $\mu$ m. (C) Western blots showing GCaMP6f and mTagBFP2  
 701 produced from the ratiometric reporter expressed by tachyzoites and bradyzoite.  $\alpha$ His and  $\alpha$ RFP antibodies  
 702 were used to probe the expression of GCaMP6f and mTagBFP2, respectively. SAG1 and BAG1 serve as the  
 703 stage-specific marker of tachyzoites and bradyzoites, respectively. Actin functions as loading control. (D)  
 704 Quantification of basal calcium levels normalized by comparison of GCaMP6f to mTagBFP2 fluorescence

705 intensity ratios of intracellular and extracellular tachyzoites and bradyzoites induced for 7 days at pH 8.2 in  
706 EC buffer with or without  $\text{Ca}^{2+}$ . Data represent mean values from two independent experiments with 10 total  
707 vacuoles or cysts for each treatment. Two-tailed unpaired Student's t test, \*\*\*,  $P < 0.001$ . (E-F) Monitoring of  
708 GCaMP6f/ mTagBFP2 fluorescence intensity ratio vs. time for intracellular (E) and extracellular (F)  
709 tachyzoites and in vitro induced bradyzoites released by trypsin (0.25 mg/ml) from in vitro cysts (7 days at pH  
710 8.2) in EC buffer without  $\text{Ca}^{2+}$  in response to ionomycin (1  $\mu\text{M}$ ), thapsigargin (1  $\mu\text{M}$ ) or 10 mM  $\text{NH}_4\text{Cl}$ .  
711 Arrow indicates time of addition of agonists. Each kinetics curve represents mean data of 3 independent  
712 vacuoles or in vitro induced cysts. (G) Gene expression levels in tachyzoites and bradyzoites induced for 7  
713 days at pH 8.2. mRNA levels were measured using RT-PCR and expressed relative to the housekeeping  
714 transcript for actin. SAG1 and BAG1 were used to monitor tachyzoites and bradyzoites, respectively. Data  
715 represent the mean  $\pm$  SD of two independent assays containing triplicate samples each. Multiple Student's t  
716 tests, \*\*,  $P < 0.01$ , \*\*\*,  $P < 0.001$ .

717

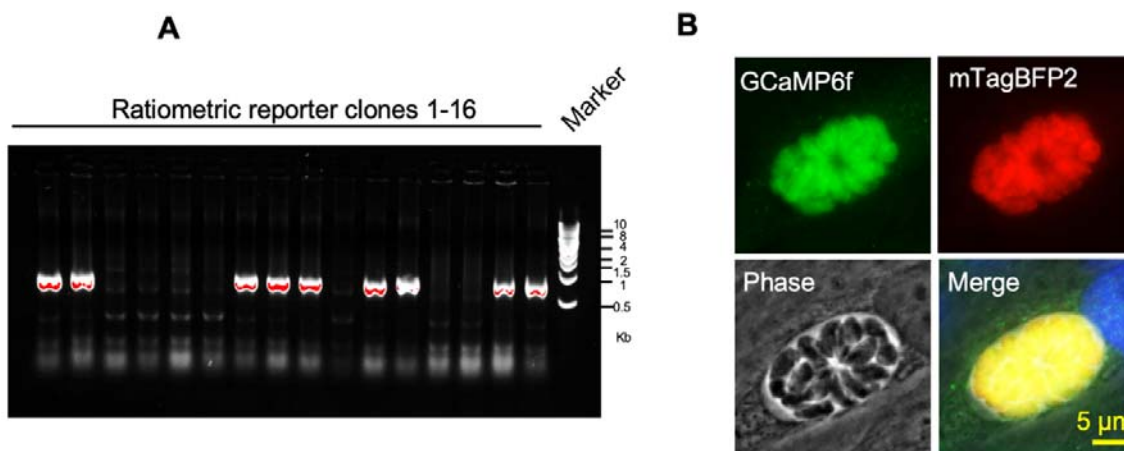

718  
719 **Figure 6 figure supplement 1 Identification of ME49 GCaMP6f-P2A-mTagBFP2 BAG1-mCherry**  
720 **ratiometric reporter by PCR and IFA**  
721 (A) Transgenic screening of clones of ME49 GCaMP6f BAG1-mCherry parasites expressing P2A-mTagBFP2  
722 at the C-terminal of GCaMP6f using PCR amplification with primer set P1-P2 shown in diagram in **Figure**  
723 **6A**. (B) IFA analysis showing co-localization of GCaMP6f and mTagBFP2 in tachyzoites of the dual reporter  
724 strain grown in HFF cells for 24 hr. Monoclonal anti-His antibody was used to stain GCaMP6f while rabbit  
725 anti-tRFP antibody was used to stain mTagBFP2 followed by goat anti-mouse IgG conjugated to Alexa  
726 Fluor-488 and goat anti-rabbit IgG conjugated to Alexa Fluor-568 secondary antibodies. Scale bar = 5 μm.  
727

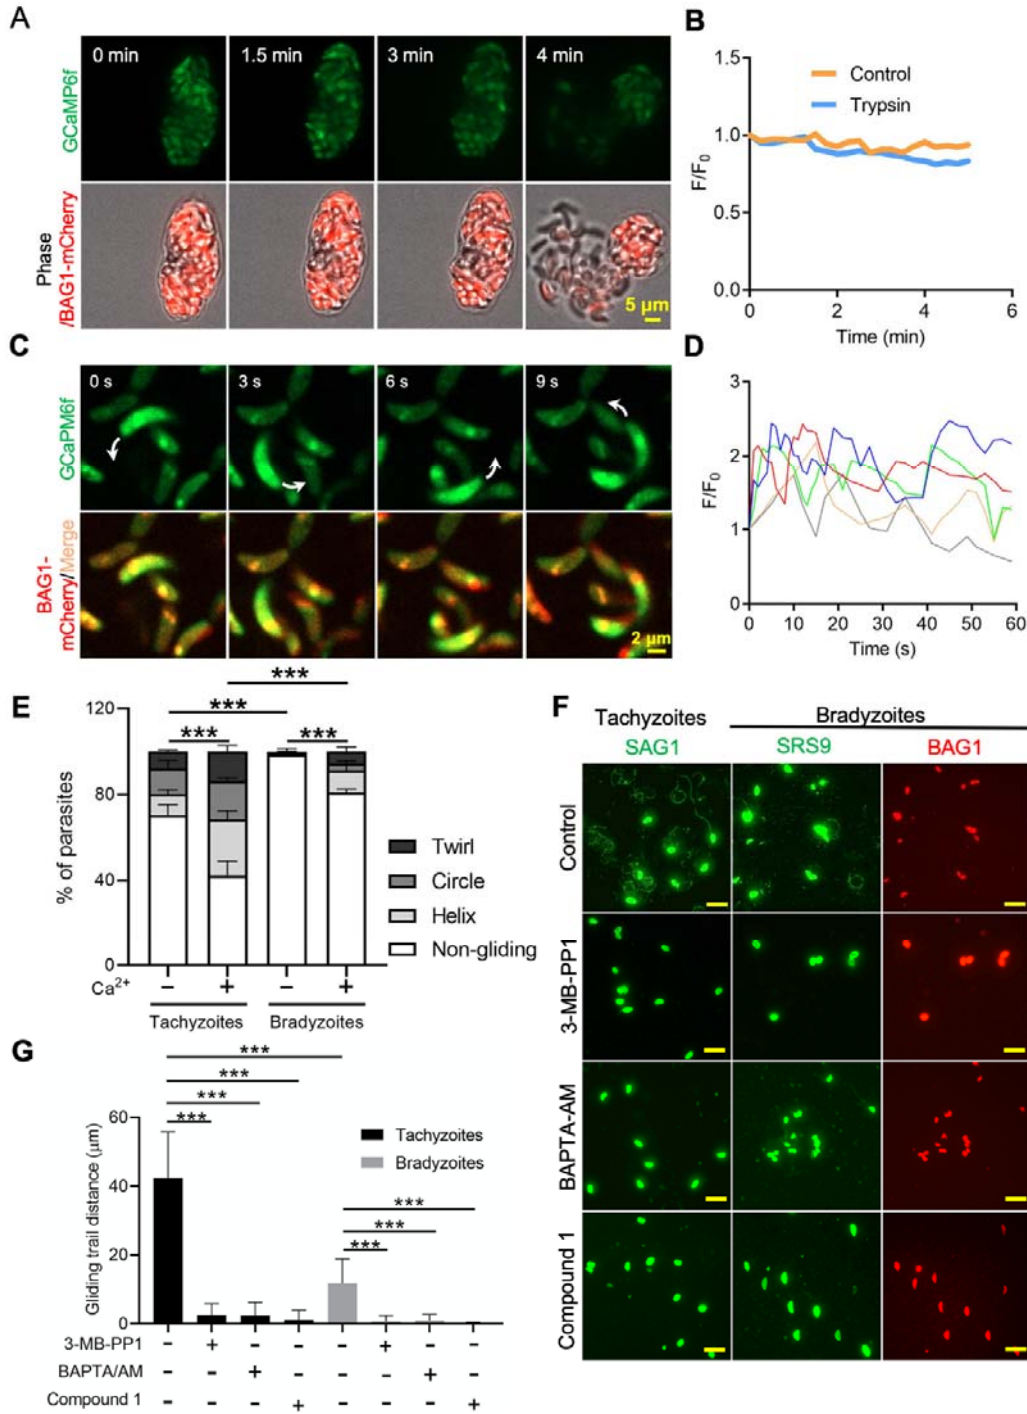

728

729 **Figure 7. Ca<sup>2+</sup> signaling governs gliding motility of bradyzoites.** (A) Time-lapse microscopy recording  
 730 GCaMP6f BAG1-mCherry bradyzoites induced for 7 days at pH 8.2. Cells were imaged during the digestion  
 731 by 0.25 mg/ml Trypsin for 5 min in EC buffer with 1.8 mM Ca<sup>2+</sup>. Bar = 5  $\mu\text{m}$ . (B) GCaMP6f fluorescence  
 732 change ratio vs. time of BAG1-mCherry GCaMP6f bradyzoites induced for 7 days at pH 8.2 treated with or  
 733 without trypsin. Curves represent mean data from 3 independent cysts. (C) Spinning disc confocal microscopy  
 734 monitoring circular gliding motility of bradyzoites liberated by 0.25 mg/ml trypsin for 10 min from cysts  
 735 induced for 7 days at pH 8.2. Arrow shows the direction of gliding motility by one bradyzoite. Bar = 5  $\mu\text{m}$ . (D)  
 736 Ca<sup>2+</sup> kinetics of bradyzoites undergoing gliding motility after liberation from cysts induced for 7 days at pH

737 8.2. The graph shows fluctuated  $\text{Ca}^{2+}$  kinetics of 5 independent single bradyzoites. (E) Percentage of parasites  
738 undergoing different forms of gliding motility as determined from time-lapse video microscopy. Tachyzoites  
739 or bradyzoites induced for 7 days at pH 8.2 were treated in EC buffer with 1.8 mM  $\text{Ca}^{2+}$  or 1 mM EGTA. Data  
740 represent means  $\pm$  SD from two independent experiments with three triplicates each. Two-way ANOVA with  
741 Tukey's multiple comparisons test, \*\*\*,  $P < 0.001$ . (F) Indirect immunofluorescence microscopy showing the  
742 trails of parasites during gliding motility. Parasites were treated with DMSO (control), 5  $\mu\text{M}$  3-MB-PP1, 25  
743  $\mu\text{M}$  BAPTA-AM and 4  $\mu\text{M}$  Compound 1. Anti-SAG1 mAb DG52 and rabbit polyclonal anti-SRS9 antibodies  
744 followed by secondary antibodies conjugated to goat anti-mouse IgG Alexa 488 were used to stain the gliding  
745 trails of tachyzoites and bradyzoites, respectively. Anti-BAG1 followed by goat anti-rabbit IgG conjugated of  
746 Alexa 568 served as marker of bradyzoites. Bar=10  $\mu\text{m}$ . (G) Quantification of trails from gliding motility of  
747 tachyzoites and bradyzoites treated with DMSO (control), 5  $\mu\text{M}$  3-MB-PP1, 25  $\mu\text{M}$  BAPTA-AM and 4  $\mu\text{M}$   
748 compound 1. Data represented as means  $\pm$  SEM ((n = 20 replicates combined from n = 3 independent  
749 experiments). Kruskal-Wallis test with Dun's multiple comparison correction \*\*\*,  $P < 0.001$ .

## 750 Rich Media Files

### 751 **Figure 1-video 1 Egress by ME49 BAG1-mCherry tachyzoites in response to A23187.**

752 Time-lapse video microscopy showing A23187 (2  $\mu\text{M}$ ) induced egress of ME49 BAG1-mCherry strain  
753 tachyzoites grown in vitro in HFF cells for 24 hr. Videos for intracellular tachyzoites in EC buffer were  
754 recorded for 10 min and A23187 (2  $\mu\text{M}$ ) was added 30 s after the recording initiated. Display frame rate is 8  
755 frames per second while the acquisition frame rate is 3 frames per second. Bar = 10  $\mu\text{m}$ .

### 756 **Figure 1-video 2 Egress by ME49 BAG1-mCherry bradyzoites in response to A23187.**

757 Time-lapse video microscopy showing A23187 (2  $\mu\text{M}$ ) induced egress of ME49 BAG1-mCherry strain  
758 bradyzoites induced by in vitro culture on HFF cells for 7 days at pH 8.2. Videos for intracellular bradyzoites  
759 in EC buffer were recorded for 10 min and A23187 (2  $\mu\text{M}$ ) was added 30 s after the recording initiated.  
760 Display frame rate is 4 frames per second while the acquisition frame rate is 10 frames per second. Bar = 10  
761  $\mu\text{m}$ .

### 762 **Figure 2-video 1 A23187 - induced permeabilization of the parasitophorous vacuole membrane (PVM)** 763 **detected by vacuolar leakage of FNR-mCherry secreted by tachyzoites.**

764 Time-lapse video microscopy showing A23187 (2  $\mu\text{M}$ )-induced FNR-mCherry leakage from the PV  
765 surrounding FNR-mCherry BAG1-EGFP expressing tachyzoites. FNR-mCherry BAG1-EGFP tachyzoites  
766 cultured under normal condition in HFF cells for 24 hr were treated with A23187 (2  $\mu\text{M}$ ) in EC buffer for 10  
767 min at 37°C. Videos were recorded for 10 min and A23187 (2  $\mu\text{M}$ ) was added 30 s after the recording initiated.  
768 Display frame rate is 6 frames per second while the acquisition frame rate is 5 frames per second. Bar = 5  $\mu\text{m}$ .

### 769 **Figure 2-video 2 Trypsin - induced disruption of in vitro differentiated tissue cysts expressing ME49**

770 **FNR-mCherry BAG1-EGFP.**

771 Time-lapse video microscopy showing A23187-induced FNR-mCherry leakage in vitro differentiated tissue  
772 cysts of FNR-mCherry BAG1-EGFP bradyzoites. FNR-mCherry BAG1-EGFP bradyzoites induced by  
773 cultivation in HFF cells in vitro for 7 days at pH 8.2 were treated with 0.25 mg/ml Trypsin in EC buffer for 6  
774 min at 37°C. Videos were recorded for 6 min and 0.25 mg/ml Trypsin was added 30 s after the recording  
775 initiated. Display frame rate is 3 frames per second while the acquisition frame rate is 15 frames per second.  
776 Bar = 5  $\mu$ m.

777 **Figure 2-video 3 A23187 -induced permeabilization of in vitro differentiated tissue cysts detected by**  
778 **vacuolar FNR-mCherry leakage from ME49 FNR-mCherry BAG1-EGFP bradyzoites.**

779 Time-lapse video microscopy showing A23187 (2  $\mu$ M)-induced FNR-mCherry leakage from in vitro  
780 differentiated cysts of FNR-mCherry BAG1-EGFP. FNR-mCherry BAG1-EGFP bradyzoites induced by  
781 cultivation in HFF cells in vitro for 7 days at pH 8.2 were treated with A23187 (2  $\mu$ M) in EC buffer for 10 min  
782 at 37°C. Videos were recorded for 10 min and A23187 (2  $\mu$ M) was added 30 s after the recording initiated.  
783 Display frame rate is 3 frames per second while the acquisition frame rate is 15 frames per second. Bar = 5  
784  $\mu$ m.

785 **Figure 3-video 1 Calcium response of ME49 BAG1-Cherry GCaMP6f expressing tachyzoites stimulated**  
786 **by A23187.**

787 Time-lapse video microscopy showing GCaMP6f fluorescence changes of intracellular ME49 BAG1-mCherry  
788 GCaMP6f tachyzoites grown in HFF cells in vitro for 24 hr in response to A23187 (2  $\mu$ M) in EC buffer.  
789 Videos were recorded for 10 min and A23187 (2  $\mu$ M) was added 30 s after the recording initiated. Display  
790 frame rate is 10 frames per second while the acquisition frame rate is 3 frames per second. Bar = 10  $\mu$ m.

791 **Figure 3-video 2 Calcium response of ME49 BAG1-Cherry GCaMP6f expressing bradyzoites**  
792 **stimulated by A23187.**

793 Time-lapse video microscopy showing GCaMP6f fluorescence changes of intracellular ME49 BAG1-mCherry  
794 GCaMP6f bradyzoites induced by cultivation in HFF cells in vitro for 7 days at pH 8.2 in response to A23187  
795 (2  $\mu$ M) in EC buffer. Videos were recorded for 14 min and A23187 (2  $\mu$ M) was added 30 s after the recording  
796 initiated. Display frame rate is 6 frames per second while the acquisition frame rate is 10 frames per second.  
797 Bar = 10  $\mu$ m.

798 **Figure 4-video 1 Calcium response of ME49 BAG1-mCherry GCaMP6f cysts isolated from chronically**  
799 **infected mouse brains and treated in vitro with DMSO.**

800 Time-lapse video microscopy showing GCaMP6f fluorescence changes of ME49 BAG1-mCherry GCaMP6f

801 cysts isolated 30 days post-infection from the brains of chronically infected mice in response to DMSO (0.1%)  
802 in EC buffer. Videos were recorded for 5 min and DMSO (0.1%) was added 15 s after the recording initiated.  
803 Display frame rate is 6 frames per second while the acquisition frame rate is 3 frames per second. Bar = 2  $\mu$ m.  
804 **Figure 4-video 2 Calcium response of ME49 BAG1-mCherry GCaMP6f cysts isolated from chronically**  
805 **infected mouse brains and treated in vitro with A23187.**

806 Time-lapse video microscopy showing GCaMP6f fluorescence changes of ME49 BAG1-mCherry GCaMP6f  
807 cysts isolated 30 days post-infection from chronically infected mice in response to A23187 (2  $\mu$ M) in EC  
808 buffer. Videos were recorded for 5 min and A23187 (2  $\mu$ M) was added 15 s after the recording initiated.  
809 Display frame rate is 6 frames per second while the acquisition frame rate is 5 frames per second. Bar = 2  $\mu$ m.

810 **Figure 5-video 1 Calcium response of extracellular ME49 BAG1-mCherry GCaMP6f tachyzoite in**  
811 **response to A23187.**

812 Time-lapse video microscopy showing GCaMP6f fluorescence changes of extracellular ME49  
813 BAG1-mCherry GCaMP6f tachyzoite in response to A23187 (2  $\mu$ M) in EC buffer. Videos were recorded for 3  
814 min and A23187 (2  $\mu$ M) was added 15 s after the recording initiated. Display frame rate is 4 frames per  
815 second while the acquisition frame rate is 3 frames per second. Bar = 2  $\mu$ m.

816 **Figure 5-video 2 Calcium response of extracellular ME49 BAG1-mCherry GCaMP6f bradyzoite in**  
817 **response to A23187.**

818 Time-lapse video microscopy showing GCaMP6f fluorescence changes of extracellular ME49  
819 BAG1-mCherry GCaMP6f bradyzoite in response to A23187 (2  $\mu$ M) in EC buffer. Bradyzoites were liberated  
820 by 0.25 mg/ml trypsin for 5 min from in vitro cysts induced for cultivation in HFF cells for 7 days at pH 8.2.  
821 Videos were recorded for 3 min and A23187 (2  $\mu$ M) was added 15 s after the recording initiated. Display  
822 frame rate is 2 frames per second while the acquisition frame rate is 5 frames per second. Bar = 2  $\mu$ m.

823 **Figure 7-video 1 Trypsin induced liberation of ME49 BAG1-mCherry GCaMP6f bradyzoites from in**  
824 **vitro cultured cysts.**

825 Time-lapse video microscopy recording GCaMP6f fluorescence changes from BAG1-mCherry GCaMP6f  
826 bradyzoites induced by cultivation in HFF cells for 7 days at pH 8.2 during digestion by 0.25 mg/ml Trypsin  
827 in EC buffer. Videos were recorded for 6 min and 0.25 mg/ml trypsin was added 30 s after the recording  
828 initiated. Display frame rate is 16 frames per second while the acquisition frame rate is 5 frames per second.  
829 Bar = 5  $\mu$ m.

830 **Figure 7-video 2 Gliding motility of ME49 BAG1-mCherry GCaMP6f bradyzoites released from in**  
831 **vitro cysts.**



832 Time-lapse video microscopy of gliding motility of bradyzoites liberated by 0.25 mg/ml trypsin for 5 min  
833 from in vitro cyst induced by cultivation in HFF cells for 7 days at pH 8.2. Images were collected using  
834 spinning disc confocal microscopy. Arrow shows the gliding motility of bradyzoite in EC buffer. Videos were  
835 recorded for 2 min. Display frame rate is 6 frames per second while the acquisition frame rate is 1 frame per  
836 second. Bar = 2  $\mu$ m.

837

### 838 **Supplementary Files**

839 Supplementary Table 1: Primers used in this study

840 Supplementary Table S2 Plasmids used in this study

841 Supplementary Table S3 Parasite lines used in this study

842

### 843 **References**

844

- 845 1. Dubey JP (2010) *Toxoplasmosis of animals and humans*. Boca Raton: CRC Press. 313 p.
- 846 2. Jones JL, Dubey JP (2012) Foodborne Toxoplasmosis. *Clin Infect Dis* 55: 864-851.
- 847 3. Jones JL, Dubey JP (2010) Waterborne toxoplasmosis--recent developments. *Exp Parasitol* 124: 10-25.
- 848 4. Drewry LL, Sibley LD (2019) The hitchhiker's guide to parasite dissemination. *Cell Microbiol*: e13070.
- 849 5. Watts E, Zhao Y, Dhara A, Eller B, Patwardhan A, et al. (2015) Novel Approaches Reveal that *Toxoplasma gondii*  
850 Bradyzoites within Tissue Cysts Are Dynamic and Replicating Entities In Vivo. *MBio* 6: e01155-01115.
- 851 6. Jeffers V, Tampaki Z, Kim K, Sullivan WJ, Jr. (2018) A latent ability to persist: differentiation in *Toxoplasma gondii*. *Cell*  
852 *Mol Life Sci* 75: 2355-2373.
- 853 7. Mayoral J, Di Cristina M, Carruthers VB, Weiss LM (2020) *Toxoplasma gondii*: Bradyzoite Differentiation In Vitro and In  
854 Vivo. *Methods Mol Biol* 2071: 269-282.
- 855 8. Lourido S, Moreno SN (2015) The calcium signaling toolkit of the Apicomplexan parasites *Toxoplasma gondii* and  
856 *Plasmodium* spp. *Cell Calcium* 57: 186-193.
- 857 9. Carruthers VB, Sibley LD (1999) Mobilization of intracellular calcium stimulates microneme discharge in *Toxoplasma*  
858 *gondii*. *Mol Microbiol* 31: 421-428.
- 859 10. Carruthers VB, Moreno SN, Sibley LD (1999) Ethanol and acetaldehyde elevate intracellular [Ca<sup>2+</sup>] calcium and  
860 stimulate microneme discharge in *Toxoplasma gondii*. *Biochem J* 342: 379-386.
- 861 11. Wetzel DM, Chen LA, Ruiz FA, Moreno SN, Sibley LD (2004) Calcium-mediated protein secretion potentiates motility  
862 by *Toxoplasma gondii*. *J Cell Sci* 117: 5739-5748.
- 863 12. Lovett JL, Marchesini N, Moreno SN, Sibley LD (2002) *Toxoplasma gondii* microneme secretion involves intracellular  
864 Ca<sup>2+</sup> release from IP<sub>3</sub> / ryanodine sensitive stores. *J Biol Chem* 277: 25870-25876.
- 865 13. Vieira MCF, Moreno SN (2000) Mobilization of intracellular calcium upon attachment of *Toxoplasma gondii*  
866 tachyzoites to human fibroblasts is required for invasion. *Molec Biochem Parasit* 106: 157-162.
- 867 14. Pace DA, McKnight CA, Liu J, Jimenez V, Moreno SN (2014) Calcium entry in *Toxoplasma gondii* and its enhancing  
868 effect of invasion-linked traits. *J Biol Chem*.
- 869 15. Kafsack BF, Pena JD, Coppens I, Ravindran S, Boothroyd JC, et al. (2009) Rapid membrane disruption by a  
870 perforin-like protein facilitates parasite exit from host cells. *Science* 323: 530-533.
- 871 16. Brown KM, Sibley LD (2018) Essential cGMP Signaling in *Toxoplasma* Is Initiated by a Hybrid P-Type  
872 ATPase-Guanylate Cyclase. *Cell Host Microbe* 24: 804-816 e806.
- 873 17. Bisio H, Lunghi M, Brochet M, Soldati-Favre D (2019) Phosphatidic acid governs natural egress in *Toxoplasma gondii*

- 874 via a guanylate cyclase receptor platform. *Nat Microbiol* 4: 420-428.
- 875 18. Yang L, Uboldi AD, Seizova S, Wilde ML, Coffey MJ, et al. (2019) An apically located hybrid guanylate cyclase-ATPase  
876 is critical for the initiation of Ca<sup>2+</sup> signaling and motility in *Toxoplasma gondii*. *J Biol Chem* 294: 8959-8972.
- 877 19. Brown KM, Long S, Sibley LD (2017) Plasma membrane association by N-acylation governs PKG function in  
878 *Toxoplasma gondii*. *mBio* 8(3): e00375-00317.
- 879 20. Fang J, Marchesini N, Moreno SNJ (2006) A *Toxoplasma gondii* phosphoinositide phospholipase C (TgPI-PLC) with  
880 high affinity for phosphatidylinositol. *Biochem J* 394: 417-425.
- 881 21. Bullen HE, Jia Y, Yamaryo-Botte Y, Bisio H, Zhang O, et al. (2016) Phosphatidic Acid-Mediated Signaling Regulates  
882 Microneme Secretion in *Toxoplasma*. *Cell Host Microbe* 19: 349-360.
- 883 22. Balestra AC, Koussis K, Klages N, Howell SA, Flynn HR, et al. (2021) Ca<sup>2+</sup> signals critical for egress and  
884 gametogenesis in malaria parasites depend on a multipass membrane protein that interacts with PKG. *Sci Adv*  
885 7.
- 886 23. Lourido S, Tang K, Sibley LD (2012) Distinct signalling pathways control *Toxoplasma* egress and host-cell invasion.  
887 *EMBO J* 31: 4524-4534.
- 888 24. McCoy JM, Whitehead L, van Dooren GG, Tonkin CJ (2012) TgCDPK3 regulates calcium-dependent egress of  
889 *Toxoplasma gondii* from host cells. *PLoS Pathog* 8: e1003066.
- 890 25. Tagoe DNA, Drozda AA, Falco JA, Bechtel TJ, Weerapana E, et al. (2021) Ferlins and TgDOC2 in *Toxoplasma*  
891 Microneme, Rhoptry and Dense Granule Secretion. *Life (Basel)* 11.
- 892 26. Long S, Brown KM, Drewry LL, Anthony B, Phan I, et al. (2017) Calmodulin-like proteins localized to the conoid  
893 regulate motility and cell invasion by *Toxoplasma gondii*. *PloS Pathogens* 13: e1006379.
- 894 27. Jia Y, Marq JB, Bisio H, Jacot D, Mueller C, et al. (2017) Crosstalk between PKA and PKG controls pH-dependent host  
895 cell egress of *Toxoplasma gondii*. *EMBO J* 36: 3250-3267.
- 896 28. Uboldi AD, Wilde ML, McRae EA, Stewart RJ, Dagley LF, et al. (2018) Protein kinase A negatively regulates Ca<sup>2+</sup>  
897 signalling in *Toxoplasma gondii*. *PLoS Biol* 16: e2005642.
- 898 29. Brown KM, Tonkin CJ, Billker O, Sibley LD (2019) Calcium and cyclic nucleotide signaling networks in *Toxoplasma*  
899 *gondii*. In: Weiss LM, Kim K, editors. *Toxoplasma gondii: The Model Apicomplexan: Perspectives and Methods*.  
900 3rd ed: Academic Press. pp. in press.
- 901 30. Hortua Triana MA, Marquez-Nogueras KM, Vella SA, Moreno SNJ (2018) Calcium signaling and the lytic cycle of the  
902 Apicomplexan parasite *Toxoplasma gondii*. *Biochim Biophys Acta Mol Cell Res* 1865: 1846-1856.
- 903 31. Nagamune K, Sibley LD (2006) Comparative genomic and phylogenetic analyses of calcium ATPases and  
904 calcium-regulated proteins in the Apicomplexa. *Molec Biol Evol* 23: 1613-1627.
- 905 32. Prole DL, Taylor CW (2011) Identification of intracellular and plasma membrane calcium channel homologues in  
906 pathogenic parasites. *PLoS One* 6: e26218.
- 907 33. Thastrup O, Cullen PJ, Drobak BK, Hanley MR, Dawson AP (1990) Thapsigargin, a tumor promoter, discharges  
908 intracellular Ca<sup>2+</sup> stores by specific inhibition of the endoplasmic reticulum Ca<sup>2+</sup>-ATPase. *Proc Natl Acad Sci USA*  
909 87: 2766-2470.
- 910 34. Nagamune K, Moreno SNJ, Sibley LD (2007) Artemisinin resistant mutants of *Toxoplasma gondii* have altered calcium  
911 homeostasis. *Anti Microb Agents Chemother* 51: 3816-3823.
- 912 35. Moreno SNJ, Zhong L (1996) Acidocalcisomes in *Toxoplasma gondii* tachyzoites. *Biochemical Journal* 313: 655-659.
- 913 36. Luo S, Ruiz FA, Moreno SN (2005) The acidocalcisome Ca<sup>2+</sup> ATPase (TgA1) of *Toxoplasma gondii* is required for  
914 polyphosphate storage, intracellular calcium homeostasis and virulence. *Molec Micro* 55: 1034-1045.
- 915 37. Vella SA, Moore CA, Li ZH, Hortua Triana MA, Potapenko E, et al. (2021) The role of potassium and host calcium  
916 signaling in *Toxoplasma gondii* egress. *Cell Calcium* 94: 102337.
- 917 38. Vella SA, Calixto A, Asady B, Li ZH, Moreno SNJ (2020) Genetic Indicators for Calcium Signaling Studies in *Toxoplasma*  
918 *gondii*. *Methods Mol Biol* 2071: 187-207.
- 919 39. Lovett JL, Sibley LD (2003) Intracellular calcium stores in *Toxoplasma gondii* govern invasion of host cells. *J Cell Sci*  
920 116: 3009-3016.

- 921 40. Sidik SM, Hortua Triana MA, Paul AS, El Bakkouri M, Hackett CG, et al. (2016) Using a Genetically Encoded Sensor to  
922 Identify Inhibitors of *Toxoplasma gondii* Ca<sup>2+</sup> Signaling. *J Biol Chem* 291: 9566-9580.
- 923 41. Borges-Pereira L, Budu A, McKnight CA, Moore CA, Vella SA, et al. (2015) Calcium Signaling throughout the  
924 *Toxoplasma gondii* Lytic Cycle: A STUDY USING GENETICALLY ENCODED CALCIUM INDICATORS. *J Biol Chem* 290:  
925 26914-26926.
- 926 42. Brown KM, Lourido S, Sibley LD (2016) Serum Albumin Stimulates Protein Kinase G-dependent Microneme Secretion  
927 in *Toxoplasma gondii*. *J Biol Chem* 291: 9554-9565.
- 928 43. Ferguson DJP, Hutchison WM, Pettersen E (1989) Tissue cyst rupture in mice chronically infected with *Toxoplasma*  
929 *gondii*. *Parasitol Res* 75: 599-603.
- 930 44. Frenkel JK, Escajadillo A (1987) Cyst rupture as a pathogenic mechanism of toxoplasmic encephalitis. *American*  
931 *Journal of Tropical Medicine and Hygiene* 36: 517-522.
- 932 45. Hofflin JM, Conley FK, Remington JS (1987) Murine model of intracerebral toxoplasmosis. *Journal of Infectious*  
933 *Diseases* 155: 550-556.
- 934 46. Soète M, Fortier B, Camus D, Dubremetz JF (1993) *Toxoplasma gondii*: kinetics of bradyzoite-tachyzoite  
935 interconversion *in vitro*. *Exp Parasitol* 76: 259-264.
- 936 47. Swierzy IJ, Luder CG (2015) Withdrawal of skeletal muscle cells from cell cycle progression triggers differentiation of  
937 *Toxoplasma gondii* towards the bradyzoite stage. *Cell Microbiol* 17: 2-17.
- 938 48. Halonen SK, Lyman WD, Chiu FC (1996) Growth and development of *Toxoplasma gondii* in human neurons and  
939 astrocytes. *J Neuropathology and Exp Neurology* 55: 1150-1156.
- 940 49. White MW, Radke JR, Radke JB (2014) *Toxoplasma* development - turn the switch on or off? *Cell Microbiol* 16:  
941 466-472.
- 942 50. Beeler TJ, Jona I, Martonosi A (1979) The effect of ionomycin on calcium fluxes in sarcoplasmic reticulum vesicles  
943 and liposomes. *J Biol Chem* 254: 6229-6231.
- 944 51. Lourido S, Shuman J, Zhang C, Shokat KM, Hui R, et al. (2010) Calcium-dependent protein kinase 1 is an essential  
945 regulator of exocytosis in *Toxoplasma*. *Nature* 465: 359-362.
- 946 52. Cranfill PJ, Sell BR, Baird MA, Allen JR, Lavagnino Z, et al. (2016) Quantitative assessment of fluorescent proteins. *Nat*  
947 *Methods* 13: 557-562.
- 948 53. Frenal K, Dubremetz JF, Lebrun M, Soldati-Favre D (2017) Gliding motility powers invasion and egress in Apicomplexa.  
949 *Nat Rev Microbiol* 15: 645-660.
- 950 54. Carruthers VB (2019) Interrupting *Toxoplasma*'s Regularly Scheduled Program of Egress. *Trends Parasitol* 35:  
951 338-340.
- 952 55. Stasic AJ, Dykes EJ, Cordeiro CD, Vella SA, Fazli MS, et al. (2021) Ca<sup>2+</sup> entry at the plasma membrane and uptake by  
953 acidic stores is regulated by the activity of the V-H(+)-ATPase in *Toxoplasma gondii*. *Mol Microbiol*.
- 954 56. Lemgruber L, Lupetti P, Martins-Duarte ES, De Souza W, Vommario RC (2011) The organization of the wall filaments  
955 and characterization of the matrix structures of *Toxoplasma gondii* cyst form. *Cell Microbiol* 13: 1920-1932.
- 956 57. Tu V, Mayoral J, Sugi T, Tomita T, Han B, et al. (2019) Enrichment and Proteomic Characterization of the Cyst Wall  
957 from In Vitro *Toxoplasma gondii* Cysts. *mBio* 10.
- 958 58. Zhang YW, Halonen SK, Ma YF, Wittner M, Weiss LM (2001) Initial characterization of CST1, a *Toxoplasma gondii* cyst  
959 wall glycoprotein. *Infect Immun* 69: 501-507.
- 960 59. Tomita T, Bzik DJ, Ma YF, Fox BA, Markillie LM, et al. (2013) The *Toxoplasma gondii* cyst wall protein CST1 is critical for  
961 cyst wall integrity and promotes bradyzoite persistence. *PLoS Pathog* 9: e1003823.
- 962 60. Tomita T, Sugi T, Yakubu R, Tu V, Ma Y, et al. (2017) Making Home Sweet and Sturdy: *Toxoplasma gondii* ppGalNAc-Ts  
963 Glycosylate in Hierarchical Order and Confer Cyst Wall Rigidity. *mBio* 8.
- 964 61. Dubey JP (1998) Re-examination of resistance of *Toxoplasma gondii* tachyzoites and bradyzoites to pepsin and  
965 trypsin digestion. *Parasitology* 116: 43-50.
- 966 62. Dzierszynski F, Nishi M, Ouko L, Roos DS (2004) Dynamics of *Toxoplasma gondii* differentiation. *Eukaryot Cell* 3:  
967 992-1003.

- 968 63. Bhadra R, Cobb DA, Khan IA (2013) Donor CD8+ T cells prevent *Toxoplasma gondii* de-encystation but fail to rescue  
969 the exhausted endogenous CD8+ T cell population. *Infect Immun* 81: 3414-3425.
- 970 64. Jeong YI, Hong SH, Cho SH, Park MY, Lee SE (2016) Induction of IL-10-producing regulatory B cells following  
971 *Toxoplasma gondii* infection is important to the cyst formation. *Biochem Biophys Res Commun* 477: 91-97.
- 972 65. Nance JP, Vannella KM, Worth D, David C, Carter D, et al. (2012) Chitinase dependent control of protozoan cyst  
973 burden in the brain. *PLoS Pathog* 8: e1002990.
- 974 66. Nadipuram SM, Thind AC, Rayatpisheh S, Wohlschlegel JA, Bradley PJ (2020) Proximity biotinylation reveals novel  
975 secreted dense granule proteins of *Toxoplasma gondii* bradyzoites. *PLoS One* 15: e0232552.
- 976 67. Rutaganira FU, Barks J, Dhason MS, Wang Q, Lopez MS, et al. (2017) Inhibition of Calcium Dependent Protein Kinase  
977 1 (CDPK1) by Pyrazolopyrimidine Analogs Decreases Establishment and Reoccurrence of Central Nervous  
978 System Disease by *Toxoplasma gondii*. *J Med Chem*.
- 979 68. Tobin CM, Knoll LJ (2012) A patatin-like protein protects *Toxoplasma gondii* from degradation in a nitric  
980 oxide-dependent manner. *Infect Immun* 80: 55-61.
- 981 69. Wang ZT, Harmon S, O'Malley KL, Sibley LD (2015) Reassessment of the role of aromatic amino acid hydroxylases and  
982 the effect of infection by *Toxoplasma gondii* on host dopamine. *Infect Immun* 83: 1039-1047.
- 983 70. Carruthers VB, Giddings OK, Sibley LD (1999) Secretion of micronemal proteins is associated with *Toxoplasma*  
984 invasion of host cells. *Cell Microbiol* 1: 225-236.
- 985 71. Alaganan A, Fentress SJ, Tang K, Wang Q, Sibley LD (2013) *Toxoplasma* GRA7 effector increases turnover of  
986 immunity-related GTPases and contributes to acute virulence in the mouse. *Proc Natl Acad Sci (USA)* 111:  
987 1126-1131.
- 988 72. Shen B, Brown K, Long S, Sibley LD (2017) Development of CRISPR/Cas9 for Efficient Genome Editing in *Toxoplasma*  
989 *gondii*. *Methods Mol Biol* 1498: 79-103.
- 990 73. Shen B, Brown KM, Lee TD, Sibley LD (2014) Efficient gene disruption in diverse strains of *Toxoplasma gondii* using  
991 CRISPR/CAS9. *mBio* 13;5(3):e01114-14.
- 992 74. Livak KJ, Schmittgen TD (2001) Analysis of relative gene expression data using real-time quantitative PCR and the  
993  $2^{-\Delta\Delta C(T)}$  method. *Methods* 25: 402-408.
- 994
